# Supplementary material for: Genome-Wide Profiling of DNA Methylation Reveals a Class of Normally Methylated CpG Island Promoters
Source: PubMed Central journal article supplement (PMC2041996; doi:10.1371/journal.pgen.0030181), 2007-10-26
Supplement: pgen.0030181.st001.pdf [file pgen.0030181.st001.pdf]

Supplementary table 1. Genes methylated in normal PBL identified by MCAM

| Accessions | ProbeName      | GeneName      | Probe location            | CGI status | Length of fragment (bp) | Signal intensity |                  | Ratio |
|------------|----------------|---------------|---------------------------|------------|-------------------------|------------------|------------------|-------|
|            |                |               |                           |            |                         | PBL              | Fully Methylated |       |
| NM_003689  | A_17_P00075036 | AKR7A2        | chr1:019383581-019383626  | dense-CGI  | 984                     | 10452.36         | 6731.86          | 1.6   |
| NM_033504  | A_17_P00124074 | TMEM54        | chr1:033036997-033037057  | dense-CGI  | 680                     | 141113.40        | 86066.53         | 1.6   |
| NM_004983  | A_76_P0126357  | KCNJ9         | chr1:156866801-156866741  | dense-CGI  | 451                     | 19734.75         | 13601.73         | 1.5   |
| NM_181644  | A_17_P00747943 | DKFZp761N1114 | chr1:202269905-202269950  | dense-CGI  | 946                     | 7772.31          | 4430.39          | 1.8   |
| NM_152666  | A_76_P0131246  | FLJ40773      | chr1:239013571-239013631  | dense-CGI  | 636                     | 7671.34          | 4372.15          | 1.8   |
| NM_017629  | A_76_P0107188  | EIF2C4        | chr1:35942233-35942293    | dense-CGI  | 734                     | 11668.28         | 7907.43          | 1.5   |
| NM_017629  | A_76_P0113819  | EIF2C4        | chr1:35942573-35942513    | dense-CGI  | 734                     | 10845.13         | 7022.15          | 1.5   |
| NM_033067  | A_76_P0130086  | DMRTB1        | chr1:53637013-53637073    | dense-CGI  | 439                     | 16330.39         | 8934.06          | 1.8   |
| NM_033067  | A_76_P0120255  | DMRTB1        | chr1:53637327-53637267    | dense-CGI  | 439                     | 45641.77         | 14552.37         | 3.1   |
| NM_152607  | A_76_P0110290  | FLJ40201      | chr1:54983818-54983878    | dense-CGI  | 834                     | 26899.86         | 13808.98         | 1.9   |
| NM_148974  | A_76_P0118935  | TNFRSF25      | chr1:6460664-6460724      | dense-CGI  | 727                     | 46329.66         | 18875.07         | 2.5   |
| NM_005185  | A_17_P07043884 | CALML3        | chr10:005557309-005557354 | dense-CGI  | 711                     | 171667.40        | 106915.90        | 1.6   |
| NM_020397  | A_17_P07078152 | CAMK1D        | chr10:012431606-012431651 | dense-CGI  | 719                     | 8392.39          | 5517.84          | 1.5   |
| NM_213569  | A_17_P07118013 | NEBL          | chr10:021503345-021503390 | dense-CGI  | 741                     | 15513.33         | 6391.28          | 2.4   |
| NM_012071  | A_17_P07122048 | COMMD3        | chr10:022645335-022645380 | dense-CGI  | 573                     | 8749.29          | 4479.65          | 2.0   |
| NM_024747  | A_76_P0102707  | HPS6          | chr10:103806097-103806157 | dense-CGI  | 777                     | 8379.04          | 5282.70          | 1.6   |
| NM_005308  | A_76_P0132627  | GRK5          | chr10:120956830-120956890 | dense-CGI  | 297                     | 6944.75          | 4290.36          | 1.6   |
| NM_198148  | A_17_P07543440 | CPXM2         | chr10:125641023-125641068 | dense-CGI  | 184                     | 128245.60        | 71545.90         | 1.8   |
| NM_145235  | A_76_P0131620  | FANK1         | chr10:127574692-127574632 | dense-CGI  | 280                     | 283895.10        | 83181.28         | 3.4   |
| NM_145235  | A_76_P0118561  | FANK1         | chr10:127574794-127574854 | dense-CGI  | 427                     | 91900.54         | 36496.09         | 2.5   |
| NM_145235  | A_76_P0123142  | FANK1         | chr10:127575020-127574960 | dense-CGI  | 427                     | 267142.90        | 58532.60         | 4.6   |
| NM_145235  | A_76_P0115092  | FANK1         | chr10:127575067-127575127 | dense-CGI  | 427                     | 135871.80        | 64661.97         | 2.1   |
| NM_145235  | A_76_P0116512  | FANK1         | chr10:127575221-127575161 | dense-CGI  | 427                     | 176919.90        | 86601.27         | 2.0   |
| NM_173572  | A_17_P07591273 | C10orf93      | chr10:134606970-134607015 | dense-CGI  | 120                     | 31377.05         | 18351.36         | 1.7   |
| NM_052997  | A_76_P0116122  | ANKRD30A      | chr10:37454821-37454881   | dense-CGI  | 1051                    | 20234            | 8378             | 2.4   |
| NM_005729  | A_76_P0116373  | PPIF          | chr10:80777447-80777507   | dense-CGI  | 983                     | 7543.16          | 4870.04          | 1.5   |
| NM_145869  | A_76_P0130924  | ANXA11        | chr10:81956298-81956238   | dense-CGI  | 707                     | 12048.60         | 7237.29          | 1.7   |
| NM_000218  | A_17_P07602914 | KCNQ1         | chr11:002422200-002422245 | dense-CGI  | 711                     | 17951.10         | 11666.59         | 1.5   |
| NM_014633  | A_76_P0162563  | SH2BP1        | chr11:10729245-10729185   | dense-CGI  | 694                     | 5561.67          | 3011.94          | 1.8   |
| NM_198516  | A_76_P0154731  | GALNTL4       | chr11:11600635-11600575   | dense-CGI  | 982                     | 15871.08         | 10588.60         | 1.5   |
| NM_005238  | A_17_P08111505 | ETS1          | chr11:127897129-127897189 | dense-CGI  | 667                     | 12000.29         | 7149.53          | 1.7   |
| NM_174902  | A_76_P0144849  | LOC143458     | chr11:35922518-35922578   | dense-CGI  | 658                     | 9185.20          | 4496.64          | 2.0   |
| NM_013402  | A_76_P0164043  | FADS1         | chr11:61341379-61341319   | dense-CGI  | 717                     | 10432.34         | 4573.26          | 2.3   |
| NM_002032  | A_76_P0138536  | FTH1          | chr11:61491866-61491926   | dense-CGI  | 671                     | 7320.06          | 4274.11          | 1.7   |

|              |                |          |                           |           |     |           |          |     |
|--------------|----------------|----------|---------------------------|-----------|-----|-----------|----------|-----|
| NM_022172    | A_76_P0149358  | PC       | chr11:66381380-66381440   | dense-CGI | 434 | 35915.96  | 5004.84  | 7.2 |
| NM_022172    | A_76_P0168886  | PC       | chr11:66381599-66381539   | dense-CGI | 434 | 25164.77  | 4815.47  | 5.2 |
| NM_002180    | A_76_P0146770  | IGHMBP2  | chr11:68428192-68428132   | dense-CGI | 802 | 12387.38  | 6573.04  | 1.9 |
| NM_002180    | A_76_P0160801  | IGHMBP2  | chr11:68428409-68428469   | dense-CGI | 802 | 15136.66  | 7168.29  | 2.1 |
| NM_024829    | A_17_P08205809 | FLJ22662 | chr12:014612434-014612494 | dense-CGI | 682 | 29996.85  | 15533.65 | 1.9 |
| NM_138566    | A_17_P08373619 | GLS2     | chr12:055168998-055169058 | dense-CGI | 637 | 8759.92   | 4699.11  | 1.9 |
| NM_152638    | A_17_P08528851 | C12orf12 | chr12:089850806-089850851 | dense-CGI | 90  | 164703.30 | 46705.02 | 3.5 |
| NM_152638    | A_17_P08528854 | C12orf12 | chr12:089851148-089851193 | dense-CGI | 438 | 284317.70 | 98058.32 | 2.9 |
| NM_007076    | A_76_P0169197  | HYPE     | chr12:107411112-107411052 | dense-CGI | 982 | 12536.01  | 7456.58  | 1.7 |
| NM_152759    | A_76_P0143099  | MGC35140 | chr12:121192977-121192917 | dense-CGI | 833 | 21048.40  | 11975.14 | 1.8 |
| NM_003428    | A_17_P08703726 | ZNF84    | chr12:132224222-132224267 | dense-CGI | 384 | 14209.13  | 9220.24  | 1.5 |
| NM_024829    | A_76_P0164214  | FLJ22662 | chr12:14612441-14612501   | dense-CGI | 682 | 15417.93  | 8341.30  | 1.8 |
| NM_173602    | A_76_P0160084  | KIAA1463 | chr12:49184652-49184712   | dense-CGI | 999 | 5293.43   | 3254.92  | 1.6 |
| NM_199187    | A_76_P0159746  | KRT18    | chr12:51628458-51628518   | dense-CGI | 627 | 8750.81   | 4159.78  | 2.1 |
| NM_199187    | A_76_P0144369  | KRT18    | chr12:51628908-51628848   | dense-CGI | 627 | 17339.74  | 8607.13  | 2.0 |
| NM_018416    | A_76_P0152381  | FOXJ2    | chr12:8075850-8075910     | dense-CGI | 591 | 10482.55  | 4158.62  | 2.5 |
| NM_020698    | A_76_P0170130  | TMCC3    | chr12:93547055-93546995   | dense-CGI | 485 | 5886.93   | 3333.98  | 1.8 |
| NM_017826    | A_17_P08780520 | FLJ20449 | chr13:035686476-035686521 | dense-CGI | 336 | 283227.80 | 90167.87 | 3.1 |
| NM_017826    | A_17_P08780521 | FLJ20449 | chr13:035686608-035686653 | dense-CGI | 336 | 277659.30 | 82892.27 | 3.3 |
| NM_178861    | A_17_P09068707 | RNF113B  | chr13:097627412-097627457 | dense-CGI | 359 | 145160.30 | 65910.60 | 2.2 |
| NM_006322    | A_76_P0154297  | TUBGCP3  | chr13:112290572-112290632 | dense-CGI | 753 | 4523.53   | 3009.62  | 1.5 |
| NM_006322    | A_76_P0153182  | TUBGCP3  | chr13:112290857-112290797 | dense-CGI | 753 | 8530.61   | 4714.42  | 1.8 |
| NM_024719    | A_76_P0163577  | GRTP1    | chr13:113057389-113057449 | dense-CGI | 665 | 40063.51  | 12487.33 | 3.2 |
| NM_024719    | A_17_P09148213 | GRTP1    | chr13:113057472-113057532 | dense-CGI | 665 | 54645.92  | 23622.91 | 2.3 |
| NM_014572    | A_76_P0154377  | LATS2    | chr13:20533769-20533709   | dense-CGI | 722 | 11096.36  | 4955.01  | 2.2 |
| NM_014572    | A_76_P0145455  | LATS2    | chr13:20534132-20534072   | dense-CGI | 722 | 11936.88  | 6808.95  | 1.8 |
| NM_016529    | A_76_P0157430  | ATP8A2   | chr13:24940271-24940331   | dense-CGI | 913 | 6899.85   | 3738.15  | 1.8 |
| NM_017826    | A_76_P0138137  | FLJ20449 | chr13:35686679-35686619   | dense-CGI | 336 | 58345.09  | 32229.54 | 1.8 |
| NM_025138    | A_76_P0144796  | C13orf23 | chr13:38510129-38510069   | dense-CGI | 986 | 19796.09  | 12180.02 | 1.6 |
| NM_005845    | A_76_P0170084  | ABCC4    | chr13:94751668-94751728   | dense-CGI | 371 | 15180.28  | 9330.34  | 1.6 |
| NM_001001715 | A_76_P0168210  | FARP1    | chr13:97627283-97627343   | dense-CGI | 359 | 16577.63  | 10906.35 | 1.5 |
| NM_001001715 | A_76_P0149889  | FARP1    | chr13:97628419-97628359   | dense-CGI | 892 | 39856.88  | 25827.75 | 1.5 |
| NM_173159    | A_17_P09210464 | NPAS3    | chr14:032478224-032478275 | dense-CGI | 245 | 8792.33   | 5243.47  | 1.7 |
| NM_020784    | A_17_P09293985 | KIAA1344 | chr14:052089850-052089895 | dense-CGI | 675 | 34725.22  | 21322.95 | 1.6 |
| NM_000428    | A_17_P09392084 | LTBP2    | chr14:074148680-074148730 | dense-CGI | 839 | 22635.34  | 12826.74 | 1.8 |
| NM_006427    | A_17_P09532639 | SIVA     | chr14:104289525-104289570 | dense-CGI | 362 | 156208.60 | 89925.30 | 1.7 |
| NM_031314    | A_76_P0167758  | HNRPC    | chr14:20807977-20808037   | dense-CGI | 609 | 5490.82   | 3412.85  | 1.6 |

|              |                |              |                           |           |     |           |          |     |
|--------------|----------------|--------------|---------------------------|-----------|-----|-----------|----------|-----|
| NM_002863    | A_76_P0144675  | PYGL         | chr14:50481653-50481593   | dense-CGI | 932 | 5277.45   | 3457.33  | 1.5 |
| NM_015072    | A_76_P0163122  | KIAA0998     | chr14:75197686-75197626   | dense-CGI | 870 | 6098.01   | 4074.38  | 1.5 |
| NM_002802    | A_76_P0170301  | PSMC1        | chr14:89792941-89793001   | dense-CGI | 882 | 6991.67   | 4302.91  | 1.6 |
| NM_006668    | A_76_P0137930  | CYP46A1      | chr14:99220556-99220616   | dense-CGI | 93  | 9056.10   | 5520.57  | 1.6 |
| NM_007223    | A_17_P09604630 | GPR          | chr15:038000011-038000056 | dense-CGI | 934 | 39395.21  | 25853.55 | 1.5 |
| NM_182616    | A_17_P09822650 | MGC61550     | chr15:088257492-088257537 | dense-CGI | 526 | 134740.70 | 88569.70 | 1.5 |
| NM_182616    | A_17_P09822652 | MGC61550     | chr15:088257864-088257920 | dense-CGI | 526 | 124906.00 | 71356.31 | 1.8 |
| NM_078474    | A_76_P0150957  | BLP2         | chr15:100010193-100010133 | dense-CGI | 596 | 4573.47   | 3049.99  | 1.5 |
| NM_002487    | A_76_P0142717  | NDN          | chr15:21484094-21484034   | dense-CGI | 934 | 6627.05   | 3565.39  | 1.9 |
| NM_006293    | A_76_P0161092  | TYRO3        | chr15:39638141-39638201   | dense-CGI | 487 | 19852.36  | 12090.38 | 1.6 |
| NM_002833    | A_76_P0143303  | PTPN9        | chr15:73659002-73659062   | dense-CGI | 767 | 9110.90   | 5565.12  | 1.6 |
| NM_002833    | A_76_P0160927  | PTPN9        | chr15:73659335-73659275   | dense-CGI | 767 | 6736.34   | 4550.54  | 1.5 |
| NM_001004309 | A_76_P0165399  | MGC75360     | chr15:88696820-88696760   | dense-CGI | 526 | 18024.57  | 12345.19 | 1.5 |
| NM_139057    | A_76_P0155590  | ADAMTS17     | chr15:98699636-98699576   | dense-CGI | 78  | 79891.58  | 47063.05 | 1.7 |
| NM_003345    | A_17_P09885627 | UBE2I        | chr16:001303985-001304030 | dense-CGI | 869 | 148652.70 | 94503.36 | 1.6 |
| NM_003345    | A_17_P09885628 | UBE2I        | chr16:001304204-001304249 | dense-CGI | 869 | 138268.10 | 83407.23 | 1.7 |
| NM_003345    | A_17_P09885629 | UBE2I        | chr16:001304310-001304355 | dense-CGI | 869 | 87067.06  | 50797.81 | 1.7 |
| NM_032520    | A_17_P09885838 | GNPTG        | chr16:001342115-001342160 | dense-CGI | 559 | 31982.06  | 21491.17 | 1.5 |
| hsa-mir-193b | A_17_P09939196 | hsa-mir-193b | chr16:014304583-014304643 | dense-CGI | 693 | 4846.17   | 3078.26  | 1.6 |
| NM_001004299 | A_17_P09990793 | FLJ43980     | chr16:045160079-045160124 | dense-CGI | 855 | 117657.00 | 61386.09 | 1.9 |
| NM_001004299 | A_17_P09990795 | FLJ43980     | chr16:045160429-045160476 | dense-CGI | 855 | 78269.37  | 35733.92 | 2.2 |
| NM_001004299 | A_17_P09990796 | FLJ43980     | chr16:045160586-045160631 | dense-CGI | 855 | 65408.23  | 29706.27 | 2.2 |
| NM_001004299 | A_17_P09990798 | FLJ43980     | chr16:045160768-045160813 | dense-CGI | 855 | 56969.09  | 36171.80 | 1.6 |
| NM_001004299 | A_17_P09990799 | FLJ43980     | chr16:045160893-045160938 | dense-CGI | 292 | 91285.31  | 55555.88 | 1.6 |
| NM_001039    | A_76_P0154863  | SCNN1G       | chr16:23101213-23101153   | dense-CGI | 861 | 12625.44  | 6530.98  | 1.9 |
| NM_001039    | A_76_P0163901  | SCNN1G       | chr16:23101331-23101391   | dense-CGI | 861 | 10547.67  | 7178.88  | 1.5 |
| NM_032815    | A_76_P0169233  | NFATC2IP     | chr16:28864924-28864984   | dense-CGI | 885 | 19356.78  | 5012.99  | 3.9 |
| NM_020677    | A_76_P0140049  | HSCARG       | chr16:4464619-4464679     | dense-CGI | 582 | 22832.07  | 7172.51  | 3.2 |
| NM_001004299 | A_76_P0162090  | FLJ43980     | chr16:45160296-45160356   | dense-CGI | 855 | 31725.04  | 12050.92 | 2.6 |
| NM_001004299 | A_76_P0160654  | FLJ43980     | chr16:45160632-45160572   | dense-CGI | 855 | 44045.32  | 17157.56 | 2.6 |
| NM_025187    | A_76_P0156872  | Lin10        | chr16:65700790-65700850   | dense-CGI | 853 | 18458.00  | 8123.44  | 2.3 |
| NM_025187    | A_76_P0161518  | Lin10        | chr16:65701177-65701117   | dense-CGI | 853 | 20158.65  | 5584.08  | 3.6 |
| NM_025187    | A_76_P0143627  | Lin10        | chr16:65701497-65701557   | dense-CGI | 853 | 13065.60  | 5051.56  | 2.6 |
| NM_018296mgs | A_76_P0155496  | FLJ11004     | chr16:65918326-65918266   | dense-CGI | 654 | 19857.70  | 6749.91  | 2.9 |
| NM_001740    | A_76_P0155551  | CALB2        | chr16:69949901-69949841   | dense-CGI | 931 | 21864.00  | 10476.20 | 2.1 |
| NM_145254    | A_76_P0168189  | LOC124491    | chr16:74056023-74056083   | dense-CGI | 930 | 9795.08   | 5230.68  | 1.9 |
| NM_203411    | A_17_P10215307 | LOC92162     | chr17:007698829-007698878 | dense-CGI | 503 | 4564.87   | 3031.63  | 1.5 |

|              |                |               |                           |           |     |           |           |     |
|--------------|----------------|---------------|---------------------------|-----------|-----|-----------|-----------|-----|
| NM_203411    | A_17_P10215309 | LOC92162      | chr17:007699255-007699300 | dense-CGI | 170 | 69376.05  | 44760.83  | 1.5 |
| NM_152599    | A_17_P10219538 | FLJ35773      | chr17:008642920-008642965 | dense-CGI | 440 | 118053.80 | 68690.36  | 1.7 |
| NM_152599    | A_17_P10219539 | FLJ35773      | chr17:008643040-008643085 | dense-CGI | 440 | 174559.20 | 107492.40 | 1.6 |
| NM_031934    | A_17_P10273427 | RAB34         | chr17:024068209-024068254 | dense-CGI | 111 | 24423.39  | 14961.56  | 1.6 |
| NM_031272    | A_17_P10395050 | TEX14         | chr17:054124078-054124138 | dense-CGI | 427 | 69670.05  | 40302.67  | 1.7 |
| NM_031272    | A_17_P10395052 | TEX14         | chr17:054124266-054124322 | dense-CGI | 427 | 88234.02  | 41275.73  | 2.1 |
| NM_001017918 | A_17_P10411795 | CYB561        | chr17:058868637-058868682 | dense-CGI | 473 | 55758.38  | 29936.28  | 1.9 |
| NM_014595    | A_17_P10465226 | NT5C          | chr17:070640212-070640272 | dense-CGI | 668 | 85037.62  | 49991.68  | 1.7 |
| NM_006937    | A_17_P10465390 | SUMO2         | chr17:070691484-070691544 | dense-CGI | 462 | 160301.30 | 77418.22  | 2.1 |
| NM_032134    | A_17_P10470266 | DKFZP434P0316 | chr17:071815801-071815846 | dense-CGI | 721 | 58431.81  | 34914.18  | 1.7 |
| NM_032134    | A_17_P10470267 | DKFZP434P0316 | chr17:071816087-071816133 | dense-CGI | 721 | 113629.80 | 59418.27  | 1.9 |
| NM_032134    | A_17_P10470269 | DKFZP434P0316 | chr17:071816298-071816358 | dense-CGI | 721 | 80574.10  | 48196.26  | 1.7 |
| NM_004127    | A_17_P10494939 | GPS1          | chr17:077603092-077603137 | dense-CGI | 472 | 35816.61  | 20234.92  | 1.8 |
| NM_006224    | A_76_P0144375  | PITPNA        | chr17:1420467-1420527     | dense-CGI | 599 | 45144.23  | 22922.97  | 2.0 |
| NM_004140    | A_76_P0160626  | LLGL1         | chr17:18069999-18070059   | dense-CGI | 670 | 21629.49  | 11914.57  | 1.8 |
| NM_003563    | A_76_P0154219  | SPOP          | chr17:45110678-45110738   | dense-CGI | 723 | 6184.16   | 3039.09   | 2.0 |
| NM_005450    | A_76_P0147203  | NOG           | chr17:52026365-52026305   | dense-CGI | 94  | 11100.78  | 6654.10   | 1.7 |
| NM_022036    | A_76_P0167498  | GPRC5C        | chr17:69940620-69940680   | dense-CGI | 793 | 10779.34  | 5231.81   | 2.1 |
| NM_032134    | A_76_P0148110  | DKFZP434P0316 | chr17:71815816-71815876   | dense-CGI | 721 | 51022.84  | 29580.52  | 1.7 |
| NM_032134    | A_76_P0139591  | DKFZP434P0316 | chr17:71816122-71816062   | dense-CGI | 721 | 55902.70  | 27887.05  | 2.0 |
| NM_022158    | A_76_P0171811  | FN3K          | chr17:78285648-78285708   | dense-CGI | 852 | 29391.33  | 18994.02  | 1.5 |
| NM_152599    | A_76_P0170038  | FLJ35773      | chr17:8643173-8643113     | dense-CGI | 440 | 62874.66  | 33475.15  | 1.9 |
| NM_152599    | A_76_P0166389  | FLJ35773      | chr17:8643660-8643600     | dense-CGI | 711 | 26344.05  | 17079.33  | 1.5 |
| NM_004853    | A_76_P0139484  | STX8          | chr17:9419648-9419708     | dense-CGI | 178 | 12980.93  | 6728.30   | 1.9 |
| NM_017876    | A_17_P10851094 | RNF126        | chr19:000599167-000599212 | dense-CGI | 639 | 78944.21  | 30613.27  | 2.6 |
| NM_001252    | A_17_P10870657 | TNFSF7        | chr19:006542339-006542386 | dense-CGI | 726 | 8069.82   | 4717.47   | 1.7 |
| NM_015318    | A_17_P10872745 | ARHGEF18      | chr19:007411085-007411130 | dense-CGI | 272 | 219582.90 | 141765.80 | 1.5 |
| NM_015318    | A_17_P10872749 | ARHGEF18      | chr19:007411500-007411550 | dense-CGI | 144 | 219061.70 | 84061.47  | 2.6 |
| NM_198537    | A_17_P10909602 | FLJ44968      | chr19:019500851-019500896 | dense-CGI | 282 | 289507.60 | 174848.20 | 1.7 |
| NM_016573    | A_17_P10910019 | GMIP          | chr19:019601582-019601642 | dense-CGI | 970 | 17653.51  | 12047.80  | 1.5 |
| NM_016573    | A_17_P10910020 | GMIP          | chr19:019601708-019601759 | dense-CGI | 970 | 15811.43  | 10510.27  | 1.5 |
| NM_001864    | A_17_P10950298 | COX7A1        | chr19:041334883-041334928 | dense-CGI | 46  | 7069.72   | 4746.05   | 1.5 |
| NM_170720    | A_17_P10983726 | KCNJ14        | chr19:053656945-053656990 | dense-CGI | 635 | 60768.03  | 36804.84  | 1.7 |
| NM_170720    | A_17_P10983727 | KCNJ14        | chr19:053657056-053657101 | dense-CGI | 635 | 317601.80 | 216778.70 | 1.5 |
| NM_014037    | A_17_P10986125 | SLC6A16       | chr19:054519934-054519979 | dense-CGI | 247 | 170378.30 | 115564.40 | 1.5 |
| hsa-mir-373  | A_17_P10998282 | hsa-mir-373   | chr19:058983592-058983652 | dense-CGI | 452 | 113013.90 | 74697.61  | 1.5 |
| hsa-mir-373  | A_17_P10998283 | hsa-mir-373   | chr19:058983759-058983806 | dense-CGI | 452 | 102716.20 | 65290.08  | 1.6 |

|              |                |           |                          |           |     |           |           |     |
|--------------|----------------|-----------|--------------------------|-----------|-----|-----------|-----------|-----|
| NM_020428    | A_76_P0170540  | CTL2      | chr19:10597571-10597511  | dense-CGI | 808 | 101965.40 | 49272.56  | 2.1 |
| NM_001004314 | A_76_P0139504  | FLJ46419  | chr19:12063881-12063941  | dense-CGI | 236 | 7171.94   | 3086.83   | 2.3 |
| NM_052876    | A_76_P0165001  | BTBD14B   | chr19:13090327-13090387  | dense-CGI | 197 | 17911.47  | 9932.79   | 1.8 |
| NM_001319    | A_76_P0157660  | CSNK1G2   | chr19:1920345-1920405    | dense-CGI | 866 | 66025.28  | 35496.80  | 1.9 |
| NM_001319    | A_76_P0155656  | CSNK1G2   | chr19:1920682-1920622    | dense-CGI | 866 | 81507.98  | 53435.89  | 1.5 |
| NM_001319    | A_76_P0166824  | CSNK1G2   | chr19:1920902-1920962    | dense-CGI | 866 | 44639.90  | 25054.68  | 1.8 |
| NM_033103    | A_76_P0147311  | RHPN2     | chr19:38248272-38248332  | dense-CGI | 623 | 18189.22  | 4784.20   | 3.8 |
| NM_153233    | A_76_P0144613  | FLJ36445  | chr19:41191713-41191653  | dense-CGI | 577 | 13644.44  | 6560.95   | 2.1 |
| NM_032878    | A_76_P0144186  | MGC15677  | chr19:41191916-41191976  | dense-CGI | 577 | 8037.21   | 4300.80   | 1.9 |
| NM_133466    | A_76_P0143168  | ZNF545    | chr19:41601480-41601540  | dense-CGI | 897 | 5014.50   | 3140.47   | 1.6 |
| NM_002446    | A_76_P0145378  | MAP3K10   | chr19:45389541-45389481  | dense-CGI | 940 | 8053.79   | 5515.70   | 1.5 |
| NM_004359    | A_76_P0149112  | CDC34     | chr19:481952-482012      | dense-CGI | 594 | 5157.16   | 3378.79   | 1.5 |
| NM_006509    | A_76_P0168981  | RELB      | chr19:50196731-50196791  | dense-CGI | 974 | 23630.10  | 16244.86  | 1.5 |
| NM_012155    | A_76_P0151874  | EML2      | chr19:50834612-50834672  | dense-CGI | 504 | 10365.56  | 4410.51   | 2.4 |
| NM_012155    | A_76_P0157099  | EML2      | chr19:50835314-50835254  | dense-CGI | 486 | 44445.14  | 19320.79  | 2.3 |
| NM_002516    | A_76_P0152224  | NOVA2     | chr19:51168979-51168919  | dense-CGI | 863 | 18516.01  | 11219.83  | 1.7 |
| NM_005184    | A_76_P0139577  | CALM3     | chr19:51796420-51796480  | dense-CGI | 365 | 8670.05   | 5187.56   | 1.7 |
| NM_012423    | A_76_P0162252  | RPL13A    | chr19:54681531-54681471  | dense-CGI | 626 | 36738.30  | 22319.74  | 1.6 |
| NM_153375    | A_76_P0170572  | PLAC2     | chr19:5518674-5518734    | dense-CGI | 388 | 8046.01   | 5207.14   | 1.5 |
| NM_020637    | A_76_P0166636  | FGF22     | chr19:590890-590950      | dense-CGI | 941 | 8398.25   | 5443.99   | 1.5 |
| NM_020637    | A_76_P0138985  | FGF22     | chr19:591123-591063      | dense-CGI | 941 | 8557.38   | 5339.61   | 1.6 |
| NM_033113    | A_76_P0170136  | ZEC       | chr19:60685097-60685157  | dense-CGI | 221 | 14028.89  | 7643.43   | 1.8 |
| NM_002579    | A_76_P0148961  | PALM      | chr19:659213-659273      | dense-CGI | 539 | 13787.26  | 7442.32   | 1.9 |
| NM_207329    | A_17_P01092989 | MYADML    | chr2:033864726-033864772 | dense-CGI | 738 | 125364.60 | 55217.42  | 2.3 |
| NM_016441    | A_17_P01103651 | CRIM1     | chr2:036495187-036495232 | dense-CGI | 58  | 79174.84  | 48514.01  | 1.6 |
| NM_004305    | A_17_P01467693 | BIN1      | chr2:127580687-127580732 | dense-CGI | 568 | 21605.75  | 14399.37  | 1.5 |
| NM_004807    | A_76_P0124402  | HS6ST1    | chr2:128793064-128793124 | dense-CGI | 911 | 11827.34  | 5584.41   | 2.1 |
| NM_001024655 | A_17_P01480852 | LOC554226 | chr2:132753535-132753580 | dense-CGI | 577 | 246469.00 | 73784.21  | 3.3 |
| NM_194317    | A_17_P01566389 | MGC52057  | chr2:150012383-150012428 | dense-CGI | 288 | 17920.62  | 10343.38  | 1.7 |
| NM_019091    | A_76_P0105951  | PLEKHA3   | chr2:179171172-179171112 | dense-CGI | 982 | 10766.51  | 5932.63   | 1.8 |
| NM_080671    | A_17_P01920363 | KCNE4     | chr2:223742900-223742960 | dense-CGI | 732 | 110220.70 | 44697.46  | 2.5 |
| NM_080671    | A_17_P01920365 | KCNE4     | chr2:223743151-223743206 | dense-CGI | 732 | 134539.80 | 41098.08  | 3.3 |
| NM_004504    | A_17_P01941996 | HRB       | chr2:228162755-228162800 | dense-CGI | 377 | 25307.44  | 14098.72  | 1.8 |
| NM_014808    | A_17_P02006784 | FARP2     | chr2:242014726-242014771 | dense-CGI | 369 | 116882.70 | 66021.25  | 1.8 |
| NM_032515    | A_17_P02007749 | BOK       | chr2:242218047-242218092 | dense-CGI | 486 | 253472.60 | 144025.70 | 1.8 |
| NM_003353    | A_76_P0101172  | UCN       | chr2:27442433-27442373   | dense-CGI | 487 | 27445.32  | 10777.89  | 2.5 |
| NM_003353    | A_76_P0134871  | UCN       | chr2:27442629-27442689   | dense-CGI | 487 | 61029.41  | 29666.90  | 2.1 |

|              |                |           |                           |           |     |           |          |     |
|--------------|----------------|-----------|---------------------------|-----------|-----|-----------|----------|-----|
| NM_207329    | A_76_P0117676  | MYADML    | chr2:33864812-33864872    | dense-CGI | 738 | 124430.60 | 52355.91 | 2.4 |
| NM_032107    | A_17_P11180349 | L3MBTL    | chr20:041576626-041576671 | dense-CGI | 968 | 35078.53  | 23621.73 | 1.5 |
| NM_014835    | A_17_P11259590 | OSBPL2    | chr20:060246794-060246839 | dense-CGI | 445 | 24199.12  | 15729.03 | 1.5 |
| NM_024299    | A_17_P11266131 | C20orf149 | chr20:061623072-061623117 | dense-CGI | 879 | 13937.65  | 8657.18  | 1.6 |
| NM_003116    | A_76_P0144268  | SPAG4     | chr20:33667310-33667370   | dense-CGI | 687 | 19361.02  | 10044.21 | 1.9 |
| NM_032107    | A_76_P0160826  | L3MBTL    | chr20:41576078-41576018   | dense-CGI | 968 | 17063.93  | 9941.64  | 1.7 |
| NM_032107    | A_76_P0168505  | L3MBTL    | chr20:41576277-41576337   | dense-CGI | 968 | 67293.29  | 46203.88 | 1.5 |
| NM_032107    | A_76_P0162004  | L3MBTL    | chr20:41576836-41576896   | dense-CGI | 968 | 28928.74  | 19343.53 | 1.5 |
| NM_002466    | A_76_P0164621  | MYBL2     | chr20:41728886-41728946   | dense-CGI | 799 | 12350.58  | 8315.03  | 1.5 |
| NM_080606    | A_76_P0149679  | BHLHB4    | chr20:61108843-61108783   | dense-CGI | 621 | 8884.56   | 4815.42  | 1.8 |
| NM_003224    | A_76_P0153222  | ARFRP1    | chr20:61809555-61809615   | dense-CGI | 901 | 24709.55  | 17010.33 | 1.5 |
| NM_003224    | A_76_P0158612  | ARFRP1    | chr20:61809620-61809560   | dense-CGI | 901 | 19692.90  | 10832.36 | 1.8 |
| NM_003681    | A_17_P11409035 | PDXK      | chr21:043962474-043962521 | dense-CGI | 504 | 16995.76  | 10793.71 | 1.6 |
| NM_001112    | A_17_P11414955 | ADARB1    | chr21:045317417-045317465 | dense-CGI | 510 | 156663.20 | 83717.86 | 1.9 |
| NM_000100    | A_76_P0145062  | CSTB      | chr21:44021096-44021156   | dense-CGI | 531 | 10505.55  | 4169.24  | 2.5 |
| NM_000100    | A_76_P0149818  | CSTB      | chr21:44021265-44021205   | dense-CGI | 531 | 13696.31  | 4020.68  | 3.4 |
| NM_032608    | A_17_P11450454 | MYO18B    | chr22:024462570-024462625 | dense-CGI | 216 | 182621.30 | 66418.46 | 2.7 |
| NM_182527    | A_17_P11467043 | CABP7     | chr22:028440994-028441039 | dense-CGI | 349 | 14159.58  | 8839.28  | 1.6 |
| NM_002969    | A_17_P11549914 | MAPK12    | chr22:049003080-049003125 | dense-CGI | 179 | 75902.12  | 45816.61 | 1.7 |
| NM_014339    | A_76_P0162426  | IL17R     | chr22:15940323-15940263   | dense-CGI | 560 | 43478.87  | 24247.25 | 1.8 |
| NM_001008496 | A_76_P0161352  | PIWIL3    | chr22:23484197-23484257   | dense-CGI | 673 | 38955.32  | 19973.76 | 2.0 |
| NM_032608    | A_76_P0168908  | MYO18B    | chr22:24462550-24462610   | dense-CGI | 216 | 21314.91  | 11711.27 | 1.8 |
| NM_021126    | A_76_P0151466  | MPST      | chr22:35744888-35744828   | dense-CGI | 339 | 34787.30  | 12598.30 | 2.8 |
| NM_033386    | A_76_P0146348  | MICAL     | chr22:36627211-36627151   | dense-CGI | 531 | 7552.16   | 4397.64  | 1.7 |
| NM_194326    | A_76_P0151744  | MGC52010  | chr22:38253527-38253587   | dense-CGI | 953 | 10386.22  | 7121.54  | 1.5 |
| NM_001008572 | A_76_P0139032  | TTL1      | chr22:41809720-41809660   | dense-CGI | 815 | 15237.20  | 6669.58  | 2.3 |
| NM_014838    | A_76_P0153973  | ZBED4     | chr22:48567632-48567572   | dense-CGI | 730 | 18577.66  | 5749.82  | 3.2 |
| NM_018995    | A_76_P0151791  | MOV10L1   | chr22:48831274-48831214   | dense-CGI | 412 | 48244.02  | 27075.39 | 1.8 |
| NM_138993    | A_76_P0154319  | MAPK11    | chr22:49011425-49011365   | dense-CGI | 100 | 11004.14  | 7389.25  | 1.5 |
| NM_138433    | A_76_P0140056  | MGC16635  | chr22:49275930-49275870   | dense-CGI | 282 | 9461.76   | 6102.04  | 1.6 |
| NM_173472    | A_17_P02054408 | MGC40179  | chr3:010124647-010124692  | dense-CGI | 653 | 118971.30 | 29317.79 | 4.1 |
| NM_182702    | A_17_P02215976 | TESSP2    | chr3:046850368-046850413  | dense-CGI | 226 | 78197.55  | 38925.04 | 2.0 |
| NM_000316    | A_17_P02216261 | PTHR1     | chr3:046899111-046899162  | dense-CGI | 825 | 41447.04  | 19369.11 | 2.1 |
| NM_001009996 | A_17_P02224984 | DALRD3    | chr3:049031854-049031912  | dense-CGI | 201 | 64482.08  | 41751.06 | 1.5 |
| NM_018446    | A_17_P02241308 | GLT8D1    | chr3:052715643-052715694  | dense-CGI | 772 | 7271.37   | 3356.29  | 2.2 |
| NM_173472    | A_76_P0100081  | MGC40179  | chr3:10124767-10124707    | dense-CGI | 653 | 14249.09  | 7208.04  | 2.0 |
| NM_000373    | A_76_P0101178  | UMPS      | chr3:125932275-125932335  | dense-CGI | 937 | 9079.30   | 4617.38  | 2.0 |

|              |                |             |                          |           |     |           |           |     |
|--------------|----------------|-------------|--------------------------|-----------|-----|-----------|-----------|-----|
| NM_004766    | A_76_P0134539  | COPB2       | chr3:140590982-140591042 | dense-CGI | 852 | 7984.72   | 5450.64   | 1.5 |
| NM_002628    | A_17_P02668733 | PFN2        | chr3:151171504-151171549 | dense-CGI | 668 | 53204.64  | 14594.30  | 3.6 |
| NM_012287    | A_76_P0132004  | CENTB2      | chr3:196644737-196644677 | dense-CGI | 861 | 13300.60  | 6910.03   | 1.9 |
| NM_012157    | A_76_P0105655  | FBXL2       | chr3:33293827-33293767   | dense-CGI | 939 | 4826.91   | 3327.33   | 1.5 |
| NM_032432    | A_17_P02916222 | ABLIM2      | chr4:008124914-008124959 | dense-CGI | 340 | 219284.90 | 123658.90 | 1.8 |
| hsa-mir-95   | A_17_P02916223 | hsa-mir-95  | chr4:008125245-008125297 | dense-CGI | 464 | 51721.95  | 31080.77  | 1.7 |
| hsa-mir-95   | A_17_P02916225 | hsa-mir-95  | chr4:008125505-008125554 | dense-CGI | 464 | 123515.40 | 64661.40  | 1.9 |
| NM_031279    | A_76_P0117546  | AGXT2L1     | chr4:110041990-110041930 | dense-CGI | 867 | 12026.09  | 5765.77   | 2.1 |
| NM_004249    | A_76_P0128725  | RAB28       | chr4:13162523-13162583   | dense-CGI | 508 | 8540.91   | 5763.48   | 1.5 |
| NM_024605    | A_76_P0112585  | ARHGAP10    | chr4:149010266-149010206 | dense-CGI | 767 | 7196.41   | 4514.38   | 1.6 |
| NM_144979    | A_17_P03544796 | MGC27016    | chr4:156060209-156060254 | dense-CGI | 452 | 225043.00 | 150692.60 | 1.5 |
| NM_019039    | A_17_P03940109 | DDX4        | chr5:055068598-055068647 | dense-CGI | 601 | 134421.40 | 88274.76  | 1.5 |
| NM_153610    | A_17_P04042255 | CMYA5       | chr5:079021681-079021731 | dense-CGI | 491 | 163017.10 | 89916.28  | 1.8 |
| NM_032028    | A_17_P04200892 | TSSK1       | chr5:112798153-112798198 | dense-CGI | 138 | 40687.14  | 21054.41  | 1.9 |
| NM_177478    | A_17_P04238269 | FTMT        | chr5:121215812-121215860 | dense-CGI | 141 | 174155.30 | 55990.19  | 3.1 |
| NM_032151    | A_76_P0119507  | PCBD2       | chr5:134268972-134269032 | dense-CGI | 928 | 50803.39  | 27082.04  | 1.9 |
| NM_004598    | A_76_P0129978  | SPOCK       | chr5:136861855-136861795 | dense-CGI | 627 | 53412.11  | 18124.98  | 2.9 |
| NM_018834    | A_17_P04318150 | MATR3       | chr5:138656230-138656276 | dense-CGI | 328 | 106370.40 | 57978.40  | 1.8 |
| NM_004499    | A_76_P0134209  | HNRPAB      | chr5:177563648-177563708 | dense-CGI | 373 | 25273.59  | 7063.58   | 3.6 |
| NM_017614    | A_76_P0123831  | BHMT2       | chr5:78401341-78401401   | dense-CGI | 51  | 6051.11   | 4045.47   | 1.5 |
| NM_001012426 | A_17_P04688299 | FOXP4       | chr6:041621678-041621723 | dense-CGI | 638 | 5468.15   | 3709.09   | 1.5 |
| NM_002395    | A_17_P04859572 | ME1         | chr6:084198057-084198104 | dense-CGI | 256 | 335191.20 | 191092.30 | 1.8 |
| NM_001431    | A_76_P0104868  | EPB41L2     | chr6:131426107-131426047 | dense-CGI | 535 | 4626.74   | 3135.91   | 1.5 |
| NM_130900    | A_17_P05165916 | RAET1L      | chr6:150439001-150439046 | dense-CGI | 433 | 57741.53  | 34954.27  | 1.7 |
| NM_024630    | A_76_P0125040  | ZDHHC14     | chr6:157773258-157773198 | dense-CGI | 407 | 14646.22  | 9777.20   | 1.5 |
| NM_005453    | A_76_P0123302  | ZNF297      | chr6:33390476-33390416   | dense-CGI | 741 | 17551.46  | 8253.17   | 2.1 |
| NM_003958    | A_76_P0120490  | RNF8        | chr6:37429678-37429738   | dense-CGI | 920 | 10510.45  | 6279.18   | 1.7 |
| NM_018665    | A_76_P0124694  | DDX43-DPPA5 | chr6:74159895-74159835   | dense-CGI | 909 | 7936      | 1745      | 4.5 |
| NM_016587    | A_17_P05373127 | CBX3        | chr7:026014693-026014738 | dense-CGI | 785 | 21393.23  | 12463.07  | 1.7 |
| NM_006833    | A_17_P05646023 | COPS6       | chr7:099331429-099331474 | dense-CGI | 69  | 47818.11  | 21153.31  | 2.3 |
| NM_018412    | A_17_P05719978 | ST7         | chr7:116186936-116186983 | dense-CGI | 500 | 19462.97  | 6245.37   | 3.1 |
| NM_022742    | A_17_P05774712 | NAG6        | chr7:128025167-128025212 | dense-CGI | 302 | 27249.62  | 18516.11  | 1.5 |
| NM_005631    | A_76_P0102533  | SMO         | chr7:128422693-128422753 | dense-CGI | 463 | 9811.80   | 5949.10   | 1.6 |
| NM_177525    | A_17_P05781778 | MEST        | chr7:129724727-129724772 | dense-CGI | 68  | 20813.86  | 5020.17   | 4.1 |
| NM_005397    | A_17_P05785928 | PODXL       | chr7:130698918-130698963 | dense-CGI | 571 | 32811.34  | 18292.87  | 1.8 |
| NM_022087    | A_76_P0123321  | GALNT11     | chr7:151160271-151160211 | dense-CGI | 353 | 13524.00  | 6945.67   | 1.9 |
| NM_014766    | A_76_P0118905  | SCRN1       | chr7:29803068-29803128   | dense-CGI | 641 | 10982.69  | 3795.32   | 2.9 |

|           |                |               |                          |           |     |           |           |     |
|-----------|----------------|---------------|--------------------------|-----------|-----|-----------|-----------|-----|
| NM_002314 | A_76_P0136886  | LIMK1         | chr7:72942385-72942445   | dense-CGI | 624 | 15955.71  | 10957.67  | 1.5 |
| NM_177455 | A_76_P0118943  | MIST1         | chr7:97486413-97486353   | dense-CGI | 41  | 6311.07   | 4220.98   | 1.5 |
| NM_177455 | A_76_P0105863  | MIST1         | chr7:97486498-97486558   | dense-CGI | 923 | 35606.72  | 20671.77  | 1.7 |
| NM_015395 | A_76_P0112748  | DKFZP434B0335 | chr7:97526455-97526395   | dense-CGI | 626 | 6880.96   | 3532.51   | 1.9 |
| NM_018842 | A_76_P0125537  | BAIAP2L1      | chr7:97675452-97675392   | dense-CGI | 654 | 8913.91   | 6043.93   | 1.5 |
| NM_015359 | A_17_P06005545 | SLC39A14      | chr8:022279743-022279788 | dense-CGI | 986 | 72557.73  | 36419.05  | 2.0 |
| NM_145003 | A_76_P0131682  | FLJ31164      | chr8:143482539-143482479 | dense-CGI | 929 | 11515.42  | 6242.50   | 1.8 |
| NM_017527 | A_76_P0118015  | LY6K          | chr8:143778743-143778683 | dense-CGI | 671 | 16004.79  | 8102.56   | 2.0 |
| NM_024736 | A_76_P0110685  | GSDMDC1       | chr8:144709959-144710019 | dense-CGI | 881 | 23620.37  | 10600.59  | 2.2 |
| NM_032862 | A_17_P06533475 | TIGD5         | chr8:144751686-144751731 | dense-CGI | 647 | 11236.14  | 7633.10   | 1.5 |
| NM_017570 | A_17_P06535205 | OPLAH         | chr8:145186857-145186902 | dense-CGI | 340 | 279457.90 | 123717.30 | 2.3 |
| NM_006765 | A_76_P0117875  | TUSC3         | chr8:15441886-15441826   | dense-CGI | 849 | 13579.53  | 7196.82   | 1.9 |
| NM_032410 | A_76_P0126396  | HOOK3         | chr8:42871383-42871443   | dense-CGI | 997 | 6054.45   | 4118.11   | 1.5 |
| NM_144651 | A_76_P0132286  | FLJ25471      | chr8:52484570-52484510   | dense-CGI | 699 | 37431.05  | 6274.63   | 6.0 |
| NM_144651 | A_76_P0100174  | FLJ25471      | chr8:52484741-52484801   | dense-CGI | 699 | 104831.30 | 69985.01  | 1.5 |
| NM_018444 | A_76_P0124120  | PPM2C         | chr8:94998448-94998508   | dense-CGI | 714 | 29980.73  | 14822.11  | 2.0 |
| NM_173549 | A_76_P0113505  | FLJ39553      | chr8:99145683-99145623   | dense-CGI | 861 | 34124.72  | 18492.63  | 1.8 |
| NM_007179 | A_17_P06561914 | INSL6         | chr9:005175453-005175501 | dense-CGI | 835 | 139989.30 | 29961.59  | 4.7 |
| NM_007179 | A_17_P06561917 | INSL6         | chr9:005175801-005175846 | dense-CGI | 835 | 144513.10 | 42898.87  | 3.4 |
| NM_007179 | A_17_P06561918 | INSL6         | chr9:005175919-005175973 | dense-CGI | 835 | 128884.80 | 28854.52  | 4.5 |
| NM_022160 | A_17_P06642800 | DMRTA1        | chr9:022437022-022437067 | dense-CGI | 464 | 8883.00   | 5783.85   | 1.5 |
| NM_000907 | A_17_P06700226 | NPR2          | chr9:035782065-035782116 | dense-CGI | 673 | 198169.40 | 117760.80 | 1.7 |
| NM_000907 | A_17_P06700229 | NPR2          | chr9:035782389-035782434 | dense-CGI | 673 | 89462.57  | 52620.41  | 1.7 |
| NM_002048 | A_17_P06796583 | GAS1          | chr9:086791323-086791375 | dense-CGI | 548 | 28423.79  | 13645.15  | 2.1 |
| NM_018376 | A_76_P0123843  | NIPSNAP3B     | chr9:104605245-104605305 | dense-CGI | 872 | 13933.29  | 5587.97   | 2.5 |
| NM_005156 | A_17_P06902904 | ROD1          | chr9:112175026-112175071 | dense-CGI | 889 | 15151.89  | 9983.28   | 1.5 |
| NM_006752 | A_17_P06993719 | SURF5         | chr9:133244173-133244218 | dense-CGI | 732 | 42040.42  | 25867.00  | 1.6 |
| NM_017588 | A_17_P06997477 | WDR5          | chr9:134030323-134030368 | dense-CGI | 82  | 35760.66  | 23100.28  | 1.5 |
| NM_007179 | A_76_P0103962  | INSL6         | chr9:5175577-5175517     | dense-CGI | 835 | 64872.32  | 13241.98  | 4.9 |
| NM_007179 | A_76_P0136785  | INSL6         | chr9:5175796-5175856     | dense-CGI | 835 | 49591.57  | 13802.31  | 3.6 |
| NM_007179 | A_76_P0108195  | INSL6         | chr9:5176120-5176060     | dense-CGI | 835 | 39722.64  | 13437.58  | 3.0 |
| NM_004148 | A_76_P0114598  | NINJ1         | chr9:92975987-92975927   | dense-CGI | 281 | 16797.00  | 11556.13  | 1.5 |
| NM_032823 | A_76_P0119925  | C9orf3        | chr9:94568062-94568002   | dense-CGI | 790 | 4480.14   | 3013.19   | 1.5 |
| NM_005333 | A_17_P11586728 | HCCS          | chrX:010889335-010889382 | dense-CGI | 250 | 181950.00 | 103747.60 | 1.8 |
| NM_153346 | A_17_P11620001 | CXorf20       | chrX:017998232-017998277 | dense-CGI | 769 | 194997.10 | 56117.67  | 3.5 |
| NM_153346 | A_17_P11620002 | CXorf20       | chrX:017998415-017998460 | dense-CGI | 769 | 114288.40 | 35135.93  | 3.3 |
| NM_153346 | A_17_P11620004 | CXorf20       | chrX:017998609-017998656 | dense-CGI | 769 | 95611.25  | 31851.72  | 3.0 |



|              |                |               |                          |           |     |           |          |     |
|--------------|----------------|---------------|--------------------------|-----------|-----|-----------|----------|-----|
| NM_153270    | A_17_P11634620 | RP11-450P7.3  | chrX:021435754-021435799 | dense-CGI | 182 | 46969.77  | 31851.41 | 1.5 |
| NM_153270    | A_17_P11634621 | RP11-450P7.3  | chrX:021436127-021436172 | dense-CGI | 260 | 54291.94  | 20624.25 | 2.6 |
| NM_153270    | A_17_P11634623 | RP11-450P7.3  | chrX:021436568-021436614 | dense-CGI | 334 | 60315.96  | 31834.98 | 1.9 |
| NM_153270    | A_17_P11634624 | RP11-450P7.3  | chrX:021436728-021436773 | dense-CGI | 369 | 123195.50 | 59780.41 | 2.1 |
| NM_153270    | A_17_P11634626 | RP11-450P7.3  | chrX:021436916-021436973 | dense-CGI | 369 | 115856.40 | 47100.68 | 2.5 |
| NM_173495    | A_17_P11642136 | PTCHD1        | chrX:023111270-023111316 | dense-CGI | 445 | 141025.30 | 75960.10 | 1.9 |
| NM_173495    | A_17_P11642138 | PTCHD1        | chrX:023111447-023111492 | dense-CGI | 445 | 43825.75  | 29961.71 | 1.5 |
| NM_002970    | A_17_P11643806 | SAT           | chrX:023560973-023561018 | dense-CGI | 189 | 156528.90 | 99406.97 | 1.6 |
| NM_002970    | A_17_P11643807 | SAT           | chrX:023561092-023561143 | dense-CGI | 174 | 68867.56  | 41868.27 | 1.6 |
| NM_152632    | A_17_P11696390 | CXorf22       | chrX:035697756-035697809 | dense-CGI | 287 | 73903.70  | 37934.15 | 1.9 |
| NM_004683    | A_17_P11737537 | RGN           | chrX:046694321-046694366 | dense-CGI | 175 | 71596.93  | 46112.87 | 1.6 |
| NM_017602    | A_17_P11742373 | DKFZp761A052  | chrX:048571696-048571741 | dense-CGI | 397 | 88167.30  | 54069.83 | 1.6 |
| NM_017602    | A_17_P11742374 | DKFZp761A052  | chrX:048571819-048571865 | dense-CGI | 397 | 68324.24  | 46777.89 | 1.5 |
| NM_007075    | A_17_P11742910 | WDR45         | chrX:048714316-048714361 | dense-CGI | 913 | 36722.05  | 19756.74 | 1.9 |
| NM_007075    | A_17_P11742912 | WDR45         | chrX:048714683-048714728 | dense-CGI | 290 | 28087.62  | 15410.06 | 1.8 |
| NM_006150    | A_17_P11743134 | LMO6          | chrX:048799521-048799576 | dense-CGI | 747 | 90187.25  | 46324.38 | 1.9 |
| NM_006150    | A_17_P11743136 | LMO6          | chrX:048799699-048799746 | dense-CGI | 747 | 120300.20 | 67459.03 | 1.8 |
| NM_001025449 | A_17_P11744696 | LOC158572     | chrX:049346621-049346666 | dense-CGI | 960 | 40667.22  | 27957.36 | 1.5 |
| NM_203407    | A_17_P11749495 | LOC340602     | chrX:050982756-050982801 | dense-CGI | 576 | 139297.80 | 52154.28 | 2.7 |
| NM_203407    | A_17_P11749497 | LOC340602     | chrX:050983015-050983061 | dense-CGI | 576 | 274806.30 | 82405.10 | 3.3 |
| NM_203407    | A_17_P11749498 | LOC340602     | chrX:050983158-050983203 | dense-CGI | 576 | 99350.83  | 27833.32 | 3.6 |
| NM_001002838 | A_17_P11755566 | WNK3          | chrX:054267269-054267314 | dense-CGI | 845 | 45930.64  | 29937.08 | 1.5 |
| NM_020922    | A_17_P11755569 | WNK3          | chrX:054267992-054268042 | dense-CGI | 865 | 14844.20  | 10191.42 | 1.5 |
| NM_020922    | A_17_P11755570 | WNK3          | chrX:054268145-054268195 | dense-CGI | 865 | 18374.37  | 12625.81 | 1.5 |
| NM_004429    | A_17_P11774923 | EFNB1         | chrX:067831313-067831359 | dense-CGI | 816 | 155109.30 | 83588.03 | 1.9 |
| NM_004429    | A_17_P11774925 | EFNB1         | chrX:067831496-067831549 | dense-CGI | 816 | 55928.83  | 33432.95 | 1.7 |
| NM_004429    | A_17_P11774926 | EFNB1         | chrX:067831611-067831656 | dense-CGI | 816 | 84269.76  | 46153.66 | 1.8 |
| NM_053281    | A_17_P11813509 | DACH2         | chrX:085209875-085209934 | dense-CGI | 361 | 56375.00  | 30737.22 | 1.8 |
| NM_212559    | A_17_P11850593 | XKRX          | chrX:099990331-099990376 | dense-CGI | 329 | 56058.63  | 37837.19 | 1.5 |
| NM_194324    | A_17_P11859126 | MGC39900      | chrX:103023079-103023126 | dense-CGI | 711 | 44056.41  | 26932.69 | 1.6 |
| NM_194324    | A_17_P11859127 | MGC39900      | chrX:103023196-103023243 | dense-CGI | 711 | 59988.23  | 33995.80 | 1.8 |
| NM_153448    | A_17_P11859903 | ESX1L         | chrX:103305662-103305707 | dense-CGI | 798 | 45373.50  | 28508.85 | 1.6 |
| NM_153448    | A_17_P11859905 | ESX1L         | chrX:103306036-103306091 | dense-CGI | 890 | 15404.87  | 10034.13 | 1.5 |
| NM_153448    | A_17_P11859907 | ESX1L         | chrX:103306612-103306672 | dense-CGI | 890 | 8848.93   | 6079.62  | 1.5 |
| NM_198465    | A_17_P11866458 | NRK           | chrX:104872794-104872839 | dense-CGI | 542 | 98593.53  | 58264.72 | 1.7 |
| NM_198465    | A_17_P11866459 | NRK           | chrX:104872906-104872951 | dense-CGI | 542 | 121005.40 | 64494.82 | 1.9 |
| NM_032227    | A_17_P11881771 | RP13-360B22.2 | chrX:109052520-109052565 | dense-CGI | 552 | 124906.30 | 81455.91 | 1.5 |

|              |                |          |                          |            |     |           |           |      |
|--------------|----------------|----------|--------------------------|------------|-----|-----------|-----------|------|
| NM_006667    | A_17_P11914205 | PGRMC1   | chrX:118151584-118151642 | dense-CGI  | 161 | 69178.87  | 44920.33  | 1.5  |
| NM_024528    | A_17_P11916452 | NKAP     | chrX:118859350-118859395 | dense-CGI  | 342 | 231236.70 | 149854.30 | 1.5  |
| NM_024528    | A_76_P0154517  | NKAP     | chrX:118860151-118860091 | dense-CGI  | 718 | 9791.32   | 6323.93   | 1.5  |
| NM_001167    | A_17_P11928544 | BIRC4    | chrX:122719443-122719488 | dense-CGI  | 443 | 59361.90  | 39630.63  | 1.5  |
| NM_003069    | A_17_P11947529 | SMARCA1  | chrX:128382796-128382841 | dense-CGI  | 363 | 7664.13   | 4300.37   | 1.8  |
| NM_139035    | A_17_P11947530 | SMARCA1  | chrX:128382957-128383002 | dense-CGI  | 363 | 33322.11  | 16271.34  | 2.0  |
| NM_001448    | A_17_P11964401 | GPC4     | chrX:132275637-132275682 | dense-CGI  | 415 | 72814.28  | 38967.05  | 1.9  |
| NM_001448    | A_17_P11964402 | GPC4     | chrX:132275750-132275795 | dense-CGI  | 415 | 81947.92  | 56123.79  | 1.5  |
| NM_004484    | A_17_P11967400 | GPC3     | chrX:132844831-132844876 | dense-CGI  | 424 | 110516.60 | 40824.79  | 2.7  |
| NM_003413    | A_17_P11980033 | ZIC3     | chrX:136374293-136374338 | dense-CGI  | 844 | 41835.09  | 28554.42  | 1.5  |
| NM_003413    | A_17_P11980034 | ZIC3     | chrX:136374560-136374605 | dense-CGI  | 844 | 37210.39  | 22073.98  | 1.7  |
| NM_004114    | A_17_P11984298 | FGF13    | chrX:137518530-137518580 | dense-CGI  | 272 | 66634.87  | 37032.13  | 1.8  |
| NM_004114    | A_17_P11984300 | FGF13    | chrX:137518757-137518802 | dense-CGI  | 272 | 59912.30  | 31770.69  | 1.9  |
| NM_017856    | A_76_P0155941  | FAM51A1  | chrX:13807513-13807573   | dense-CGI  | 471 | 15484.08  | 10672.94  | 1.5  |
| NM_005634    | A_17_P11991234 | SOX3     | chrX:139312476-139312521 | dense-CGI  | 135 | 16533.91  | 7988.42   | 2.1  |
| NM_005634    | A_17_P11991236 | SOX3     | chrX:139312707-139312752 | dense-CGI  | 227 | 83978.38  | 43632.68  | 1.9  |
| NM_005634    | A_17_P11991238 | SOX3     | chrX:139313007-139313059 | dense-CGI  | 618 | 11700.10  | 6117.59   | 1.9  |
| NM_005634    | A_17_P11991239 | SOX3     | chrX:139313120-139313167 | dense-CGI  | 618 | 40520.99  | 17843.60  | 2.3  |
| NM_005634    | A_17_P11991241 | SOX3     | chrX:139313334-139313379 | dense-CGI  | 618 | 34038.19  | 15148.43  | 2.2  |
| NM_005634    | A_17_P11991244 | SOX3     | chrX:139313621-139313667 | dense-CGI  | 464 | 133299.50 | 87237.11  | 1.5  |
| NM_000252    | A_17_P12023552 | MTM1     | chrX:149407378-149407423 | dense-CGI  | 737 | 39592.52  | 24593.22  | 1.6  |
| NM_018558    | A_17_P12030849 | GABRQ    | chrX:151477313-151477358 | dense-CGI  | 472 | 176160.20 | 109625.30 | 1.6  |
| NM_000033    | A_17_P12034809 | ABCD1    | chrX:152511420-152511465 | dense-CGI  | 408 | 102644.50 | 65139.23  | 1.6  |
| NM_001018055 | A_17_P12039164 | CXorf53  | chrX:153863722-153863768 | dense-CGI  | 163 | 23901.27  | 15767.17  | 1.5  |
| NM_018196    | A_17_P12040125 | TMLHE    | chrX:154406066-154406111 | dense-CGI  | 326 | 53751.85  | 7761.36   | 6.9  |
| NM_018196    | A_17_P12040127 | TMLHE    | chrX:154406225-154406270 | dense-CGI  | 326 | 185565.10 | 10514.26  | 17.6 |
| NM_173452    | A_17_P00104683 | FCN3     | chr1:027386026-027386071 | sparse-CGI | 697 | 18498.68  | 11253.62  | 1.6  |
| NM_144622    | A_17_P00522833 | DCST2    | chr1:151818424-151818469 | sparse-CGI | 539 | 302859.30 | 198406.20 | 1.5  |
| NM_144622    | A_17_P00522835 | DCST2    | chr1:151818614-151818659 | sparse-CGI | 539 | 231890.40 | 123730.00 | 1.9  |
| NM_032323    | A_17_P00527369 | MGC13102 | chr1:153068264-153068309 | sparse-CGI | 362 | 220963.90 | 133767.40 | 1.7  |
| NM_014589    | A_76_P0116277  | PLA2G2E  | chr1:19995868-19995808   | sparse-CGI | 863 | 43648.04  | 24346.57  | 1.8  |
| NM_080431    | A_76_P0118068  | ARPM2    | chr1:2961405-2961465     | sparse-CGI | 956 | 76055.43  | 29812.32  | 2.6  |
| NM_152374    | A_76_P0131685  | FLJ38984 | chr1:35854594-35854534   | sparse-CGI | 693 | 15998.52  | 4929.80   | 3.2  |
| NM_022111    | A_76_P0110159  | CLSPN    | chr1:35905830-35905890   | sparse-CGI | 670 | 12080.62  | 4294.45   | 2.8  |
| NM_005202    | A_76_P0104834  | COL8A2   | chr1:36235244-36235304   | sparse-CGI | 669 | 23076.73  | 11710.40  | 2.0  |
| NM_005202    | A_76_P0109149  | COL8A2   | chr1:36235582-36235522   | sparse-CGI | 669 | 13515.87  | 7237.44   | 1.9  |

|              |                |             |                           |            |     |           |           |     |
|--------------|----------------|-------------|---------------------------|------------|-----|-----------|-----------|-----|
| NM_001008211 | A_17_P07081450 | OPTN        | chr10:013180617-013180677 | sparse-CGI | 262 | 70502.85  | 44712.84  | 1.6 |
| NM_001329    | A_76_P0123618  | CTBP2       | chr10:126844452-126844512 | sparse-CGI | 638 | 22576.58  | 6721.62   | 3.4 |
| NM_194303    | A_17_P07587360 | C10orf39    | chr10:133804972-133805017 | sparse-CGI | 496 | 105358.40 | 48301.07  | 2.2 |
| NM_194303    | A_17_P07587363 | C10orf39    | chr10:133805276-133805321 | sparse-CGI | 496 | 93812.32  | 50028.10  | 1.9 |
| nahsa-mi     | A_17_P07592624 | hsa-mir-202 | chr10:134950565-134950610 | sparse-CGI | 376 | 242333.10 | 106790.40 | 2.3 |
| nahsa-mi     | A_17_P07592625 | hsa-mir-202 | chr10:134950796-134950841 | sparse-CGI | 376 | 144709.80 | 57937.50  | 2.5 |
| NM_018109    | A_76_P0131571  | PAPD1       | chr10:30678887-30678827   | sparse-CGI | 735 | 62473.07  | 29446.43  | 2.1 |
| NM_005343    | A_17_P07595093 | HRAS        | chr11:000524057-000524102 | sparse-CGI | 602 | 36070.66  | 16807.79  | 2.1 |
| NM_001007139 | A_17_P07601611 | LOC492304   | chr11:002107224-002107269 | sparse-CGI | 74  | 58449.41  | 25604.69  | 2.3 |
| NM_001007139 | A_17_P07601613 | LOC492304   | chr11:002107406-002107456 | sparse-CGI | 232 | 196240.10 | 114026.50 | 1.7 |
| NM_021801    | A_17_P07612347 | MMP26       | chr11:004965548-004965608 | sparse-CGI | 460 | 29850.95  | 16390.29  | 1.8 |
| NM_021801    | A_17_P07612349 | MMP26       | chr11:004965708-004965768 | sparse-CGI | 460 | 25654.48  | 17546.35  | 1.5 |
| NM_024841    | A_17_P07753442 | FLJ14213    | chr11:036433042-036433093 | sparse-CGI | 957 | 40966.58  | 17247.60  | 2.4 |
| NM_024841    | A_17_P07753443 | FLJ14213    | chr11:036433255-036433302 | sparse-CGI | 957 | 66677.24  | 23971.64  | 2.8 |
| NM_024841    | A_17_P07753445 | FLJ14213    | chr11:036433466-036433511 | sparse-CGI | 957 | 85598.21  | 34113.80  | 2.5 |
| NM_024841    | A_17_P07753446 | FLJ14213    | chr11:036433680-036433725 | sparse-CGI | 957 | 61319.08  | 27184.03  | 2.3 |
| NM_033456    | A_17_P07843990 | KCNK7       | chr11:065120653-065120698 | sparse-CGI | 476 | 110517.70 | 71994.55  | 1.5 |
| NM_033456    | A_17_P07843992 | KCNK7       | chr11:065120970-065121015 | sparse-CGI | 476 | 154463.60 | 95291.70  | 1.6 |
| NM_014312    | A_76_P0146215  | VSIG2       | chr11:124127102-124127042 | sparse-CGI | 475 | 26983.17  | 18508.50  | 1.5 |
| NM_024841    | A_76_P0149802  | FLJ14213    | chr11:36433042-36432982   | sparse-CGI | 957 | 19487.71  | 8862.16   | 2.2 |
| NM_024841    | A_76_P0137800  | FLJ14213    | chr11:36433260-36433320   | sparse-CGI | 957 | 19455.75  | 7421.20   | 2.6 |
| NM_024841    | A_76_P0138345  | FLJ14213    | chr11:36433597-36433537   | sparse-CGI | 957 | 30377.98  | 14292.33  | 2.1 |
| NM_178443    | A_76_P0150518  | URP2        | chr11:63730129-63730189   | sparse-CGI | 821 | 53205.22  | 35039.66  | 1.5 |
| NM_002527    | A_17_P08171436 | NTF3        | chr12:005473356-005473409 | sparse-CGI | 511 | 97150.26  | 43062.19  | 2.3 |
| NM_015899    | A_17_P08324274 | PLEKHA9     | chr12:043854567-043854627 | sparse-CGI | 320 | 180587.30 | 91581.15  | 2.0 |
| NM_002273    | A_17_P08357093 | KRT8        | chr12:051585330-051585382 | sparse-CGI | 901 | 24473.58  | 16598.65  | 1.5 |
| NM_002273    | A_17_P08357096 | KRT8        | chr12:051585629-051585684 | sparse-CGI | 901 | 29404.87  | 19607.86  | 1.5 |
| NM_012240    | A_17_P08651863 | SIRT4       | chr12:119201917-119201977 | sparse-CGI | 703 | 7689.29   | 4913.45   | 1.6 |
| NM_182613    | A_17_P08699957 | FLJ33915    | chr12:131254585-131254634 | sparse-CGI | 552 | 161630.30 | 74577.48  | 2.2 |
| NM_182613    | A_17_P08699959 | FLJ33915    | chr12:131254739-131254797 | sparse-CGI | 675 | 132438.70 | 66039.44  | 2.0 |
| NM_182613    | A_17_P08699960 | FLJ33915    | chr12:131254907-131254952 | sparse-CGI | 675 | 198302.50 | 119917.00 | 1.7 |
| NM_000131    | A_17_P09147062 | F7          | chr13:112807726-112807786 | sparse-CGI | 843 | 67643.49  | 28463.26  | 2.4 |
| NM_000131    | A_17_P09147066 | F7          | chr13:112808083-112808128 | sparse-CGI | 843 | 55936.17  | 26345.89  | 2.1 |
| NM_000131    | A_17_P09147068 | F7          | chr13:112808232-112808277 | sparse-CGI | 843 | 54031.59  | 32006.97  | 1.7 |
| NM_002929    | A_76_P0152494  | GRK1        | chr13:113369631-113369691 | sparse-CGI | 278 | 71975.07  | 49430.66  | 1.5 |
| NM_002929    | A_17_P09149709 | GRK1        | chr13:113369705-113369750 | sparse-CGI | 278 | 271733.10 | 115366.60 | 2.4 |
| NM_001805    | A_17_P09166421 | CEBPE       | chr14:022657964-022658009 | sparse-CGI | 292 | 261951.50 | 139979.00 | 1.9 |

|              |                |              |                           |            |     |           |           |     |
|--------------|----------------|--------------|---------------------------|------------|-----|-----------|-----------|-----|
| NM_002471    | A_17_P09167585 | MYH6         | chr14:022927470-022927516 | sparse-CGI | 716 | 33475.38  | 16718.39  | 2.0 |
| nahsa-mi     | A_17_P09167588 | hsa-mir-208  | chr14:022927864-022927909 | sparse-CGI | 812 | 49941.94  | 31331.10  | 1.6 |
| nahsa-mi     | A_17_P09167589 | hsa-mir-208  | chr14:022928149-022928204 | sparse-CGI | 812 | 58917.83  | 40613.47  | 1.5 |
| NM_002471    | A_17_P09167695 | MYH6         | chr14:022946500-022946545 | sparse-CGI | 639 | 172790.50 | 96286.32  | 1.8 |
| NM_005794    | A_17_P09168801 | DHRS2        | chr14:023177957-023178002 | sparse-CGI | 327 | 129422.60 | 56584.63  | 2.3 |
| NM_005794    | A_17_P09168802 | DHRS2        | chr14:023178107-023178157 | sparse-CGI | 327 | 172336.30 | 75197.66  | 2.3 |
| NM_000359    | A_17_P09171116 | TGM1         | chr14:023801205-023801250 | sparse-CGI | 737 | 156757.00 | 49898.11  | 3.1 |
| NM_000359    | A_17_P09171119 | TGM1         | chr14:023801524-023801569 | sparse-CGI | 737 | 157502.50 | 54298.37  | 2.9 |
| NM_000359    | A_17_P09171121 | TGM1         | chr14:023801807-023801860 | sparse-CGI | 737 | 93349.16  | 35551.32  | 2.6 |
| NM_022137    | A_17_P09371850 | SMOC1        | chr14:069414936-069414981 | sparse-CGI | 373 | 80892.39  | 47307.90  | 1.7 |
| NM_022137    | A_17_P09371852 | SMOC1        | chr14:069415113-069415159 | sparse-CGI | 373 | 78313.00  | 40200.53  | 1.9 |
| nahsa-mi     | A_17_P09517914 | hsa-mir-381  | chr14:100582022-100582079 | sparse-CGI | 395 | 36740.85  | 14783.61  | 2.5 |
| nahsa-mi     | A_17_P09517917 | hsa-mir-382  | chr14:100582283-100582328 | sparse-CGI | 395 | 245838.60 | 133682.20 | 1.8 |
| NM_001031714 | A_17_P09532384 | C14orf173    | chr14:104246845-104246890 | sparse-CGI | 370 | 137344.60 | 84799.34  | 1.6 |
| NM_001031714 | A_17_P09532398 | C14orf173    | chr14:104249570-104249615 | sparse-CGI | 627 | 102476.20 | 49385.99  | 2.1 |
| NM_001031714 | A_17_P09532401 | C14orf173    | chr14:104249845-104249890 | sparse-CGI | 627 | 86976.09  | 32213.07  | 2.7 |
| NM_001031714 | A_17_P09532405 | C14orf173    | chr14:104250317-104250362 | sparse-CGI | 684 | 218123.60 | 71963.25  | 3.0 |
| NM_001031714 | A_17_P09532406 | C14orf173    | chr14:104250567-104250612 | sparse-CGI | 684 | 118895.50 | 34772.19  | 3.4 |
| NM_002471    | A_76_P0166242  | MYH6         | chr14:22946362-22946302   | sparse-CGI | 639 | 30476.04  | 20299.67  | 1.5 |
| NM_002471    | A_76_P0151062  | MYH6         | chr14:22946583-22946643   | sparse-CGI | 639 | 14500.77  | 9991.76   | 1.5 |
| NM_015492    | A_17_P09763526 | DKFZP434H132 | chr15:073287131-073287176 | sparse-CGI | 774 | 111807.30 | 69342.25  | 1.6 |
| NM_015492    | A_17_P09763528 | DKFZP434H132 | chr15:073287268-073287315 | sparse-CGI | 774 | 104229.80 | 65089.93  | 1.6 |
| NM_015492    | A_17_P09763530 | DKFZP434H132 | chr15:073287511-073287556 | sparse-CGI | 774 | 213618.10 | 130570.20 | 1.6 |
| NM_015492    | A_17_P09763531 | DKFZP434H132 | chr15:073287731-073287780 | sparse-CGI | 673 | 146149.20 | 76321.94  | 1.9 |
| NM_015492    | A_17_P09763532 | DKFZP434H132 | chr15:073287880-073287925 | sparse-CGI | 673 | 98161.77  | 48791.78  | 2.0 |
| NM_015492    | A_17_P09763533 | DKFZP434H132 | chr15:073288018-073288063 | sparse-CGI | 673 | 124240.90 | 55020.27  | 2.3 |
| NM_022767    | A_17_P09817042 | ISG20L1      | chr15:086970497-086970542 | sparse-CGI | 287 | 56007.72  | 30667.96  | 1.8 |
| NM_022767    | A_17_P09817044 | ISG20L1      | chr15:086970662-086970707 | sparse-CGI | 287 | 153705.00 | 92934.24  | 1.7 |
| NM_002569    | A_17_P09826190 | FURIN        | chr15:089220004-089220049 | sparse-CGI | 559 | 143814.90 | 75152.54  | 1.9 |
| NM_002569    | A_17_P09826192 | FURIN        | chr15:089220243-089220288 | sparse-CGI | 559 | 409869.90 | 226855.50 | 1.8 |
| NM_145294    | A_17_P09882889 | LOC197336    | chr16:000654982-000655042 | sparse-CGI | 930 | 32471.22  | 17362.42  | 1.9 |
| NM_145294    | A_17_P09882891 | LOC197336    | chr16:000655462-000655507 | sparse-CGI | 930 | 58045.54  | 39837.40  | 1.5 |
| NM_005823    | A_17_P09883299 | MSLN         | chr16:000750314-000750359 | sparse-CGI | 163 | 89752.76  | 50464.97  | 1.8 |
| NM_001025190 | A_17_P09883405 | MPFL         | chr16:000773064-000773109 | sparse-CGI | 255 | 122625.90 | 72634.23  | 1.7 |
| NM_001025190 | A_17_P09883406 | MPFL         | chr16:000773183-000773228 | sparse-CGI | 255 | 242108.40 | 152384.30 | 1.6 |
| NM_001025190 | A_17_P09883407 | MPFL         | chr16:000773287-000773332 | sparse-CGI | 884 | 117245.50 | 79523.73  | 1.5 |
| NM_001025190 | A_17_P09883409 | MPFL         | chr16:000773563-000773608 | sparse-CGI | 884 | 89506.80  | 55581.07  | 1.6 |

|           |                |          |                           |            |     |           |           |     |
|-----------|----------------|----------|---------------------------|------------|-----|-----------|-----------|-----|
| NM_020825 | A_17_P09887226 | CRAMP1L  | chr16:001645802-001645847 | sparse-CGI | 419 | 297404.00 | 184839.20 | 1.6 |
| NM_020825 | A_17_P09887227 | CRAMP1L  | chr16:001645932-001645977 | sparse-CGI | 419 | 230068.20 | 132107.30 | 1.7 |
| NM_020825 | A_17_P09887228 | CRAMP1L  | chr16:001646192-001646237 | sparse-CGI | 113 | 66081.00  | 18216.91  | 3.6 |
| NM_020825 | A_17_P09887229 | CRAMP1L  | chr16:001646313-001646358 | sparse-CGI | 121 | 43707.38  | 15748.24  | 2.8 |
| NM_020825 | A_17_P09887230 | CRAMP1L  | chr16:001646421-001646466 | sparse-CGI | 257 | 125458.00 | 79429.24  | 1.6 |
| NM_020825 | A_17_P09887231 | CRAMP1L  | chr16:001646548-001646593 | sparse-CGI | 257 | 26717.10  | 16282.39  | 1.6 |
| NM_032271 | A_17_P09889373 | TRAF7    | chr16:002153427-002153472 | sparse-CGI | 672 | 158142.40 | 77559.94  | 2.0 |
| NM_022452 | A_17_P09984069 | FBS1     | chr16:030583394-030583439 | sparse-CGI | 330 | 187114.70 | 112069.40 | 1.7 |
| NM_022452 | A_17_P09984071 | FBS1     | chr16:030583535-030583580 | sparse-CGI | 330 | 250921.30 | 138546.60 | 1.8 |
| NM_022452 | A_17_P09984073 | FBS1     | chr16:030583831-030583885 | sparse-CGI | 343 | 176820.30 | 106964.30 | 1.7 |
| NM_022452 | A_17_P09984074 | FBS1     | chr16:030583957-030584002 | sparse-CGI | 343 | 336368.20 | 188684.20 | 1.8 |
| NM_014699 | A_17_P09985485 | ZNF646   | chr16:030995388-030995433 | sparse-CGI | 739 | 54340.14  | 35917.56  | 1.5 |
| NM_014699 | A_17_P09985487 | ZNF646   | chr16:030995553-030995606 | sparse-CGI | 739 | 78030.35  | 49235.91  | 1.6 |
| NM_014699 | A_17_P09985488 | ZNF646   | chr16:030995760-030995813 | sparse-CGI | 739 | 81582.89  | 48418.29  | 1.7 |
| NM_014298 | A_76_P0166285  | QPRT     | chr16:29596462-29596402   | sparse-CGI | 741 | 7372.19   | 5036.71   | 1.5 |
| NM_005823 | A_76_P0138418  | MSLN     | chr16:750170-750230       | sparse-CGI | 163 | 19390.94  | 12816.68  | 1.5 |
| NM_001976 | A_17_P10203549 | ENO3     | chr17:004796096-004796141 | sparse-CGI | 365 | 143121.00 | 55391.94  | 2.6 |
| NM_017986 | A_17_P10204000 | GPR172B  | chr17:004878384-004878429 | sparse-CGI | 724 | 128830.00 | 45389.75  | 2.8 |
| NM_017986 | A_17_P10204002 | GPR172B  | chr17:004878680-004878732 | sparse-CGI | 724 | 55650.78  | 18188.87  | 3.1 |
| NM_002055 | A_17_P10336411 | GFAP     | chr17:040348395-040348440 | sparse-CGI | 215 | 184335.80 | 126171.20 | 1.5 |
| NM_000727 | A_17_P10427244 | CACNG1   | chr17:062470215-062470275 | sparse-CGI | 464 | 66406.24  | 38101.08  | 1.7 |
| NM_000727 | A_17_P10427248 | CACNG1   | chr17:062470863-062470908 | sparse-CGI | 652 | 155033.70 | 85000.37  | 1.8 |
| NM_000727 | A_17_P10427249 | CACNG1   | chr17:062471244-062471289 | sparse-CGI | 652 | 181952.60 | 84674.13  | 2.1 |
| NM_000727 | A_17_P10427251 | CACNG1   | chr17:062471394-062471439 | sparse-CGI | 652 | 131920.50 | 77556.81  | 1.7 |
| NM_019020 | A_17_P10486304 | TBC1D16  | chr17:075539846-075539891 | sparse-CGI | 801 | 71289.43  | 45418.82  | 1.6 |
| NM_015229 | A_76_P0164446  | KIAA0664 | chr17:2564825-2564885     | sparse-CGI | 441 | 27104.90  | 14273.80  | 1.9 |
| NM_080704 | A_76_P0156888  | TRPV1    | chr17:3448578-3448518     | sparse-CGI | 772 | 23513.83  | 13171.17  | 1.8 |
| NM_021939 | A_76_P0166520  | FKBP10   | chr17:37226714-37226654   | sparse-CGI | 773 | 42995.16  | 14257.92  | 3.0 |
| NM_021939 | A_76_P0162713  | FKBP10   | chr17:37226935-37226995   | sparse-CGI | 773 | 56023.77  | 17123.33  | 3.3 |
| NM_002512 | A_76_P0165481  | NME2     | chr17:46595625-46595685   | sparse-CGI | 703 | 20296.55  | 11311.60  | 1.8 |
| NM_000727 | A_76_P0145633  | CACNG1   | chr17:62470612-62470552   | sparse-CGI | 464 | 38070.88  | 25791.50  | 1.5 |
| NM_000727 | A_76_P0170646  | CACNG1   | chr17:62470826-62470886   | sparse-CGI | 652 | 50670.02  | 29714.19  | 1.7 |
| NM_000727 | A_76_P0170363  | CACNG1   | chr17:62471152-62471092   | sparse-CGI | 652 | 73839.62  | 39422.95  | 1.9 |
| NM_000727 | A_76_P0147714  | CACNG1   | chr17:62471372-62471432   | sparse-CGI | 652 | 59067.38  | 30524.33  | 1.9 |
| NM_080913 | A_76_P0161521  | ASGR2    | chr17:6960155-6960215     | sparse-CGI | 887 | 18612.96  | 6212.42   | 3.0 |
| NM_144679 | A_76_P0169759  | FLJ31528 | chr17:76835880-76835820   | sparse-CGI | 752 | 23232.84  | 8064.56   | 2.9 |
| NM_024619 | A_76_P0147485  | FN3KRP   | chr17:78266817-78266877   | sparse-CGI | 606 | 13005.41  | 4124.69   | 3.2 |

|              |                |             |                           |            |     |           |           |     |
|--------------|----------------|-------------|---------------------------|------------|-----|-----------|-----------|-----|
| NM_002385    | A_17_P10833217 | MBP         | chr18:072858273-072858325 | sparse-CGI | 465 | 253573.30 | 63273.49  | 4.0 |
| NM_002385    | A_17_P10833218 | MBP         | chr18:072858422-072858467 | sparse-CGI | 465 | 192895.80 | 57385.50  | 3.4 |
| NM_002385    | A_76_P0138649  | MBP         | chr18:72858199-72858139   | sparse-CGI | 465 | 55486.15  | 34467.91  | 1.6 |
| NM_002385    | A_76_P0168991  | MBP         | chr18:72858419-72858479   | sparse-CGI | 465 | 47065.64  | 31690.51  | 1.5 |
| NM_173481    | A_17_P10851373 | C19orf21    | chr19:000701854-000701899 | sparse-CGI | 626 | 148338.70 | 81558.77  | 1.8 |
| NM_173481    | A_17_P10851374 | C19orf21    | chr19:000701972-000702017 | sparse-CGI | 626 | 293962.20 | 158084.50 | 1.9 |
| NM_032447    | A_17_P10875200 | FBN3        | chr19:008118152-008118197 | sparse-CGI | 360 | 154158.70 | 105800.80 | 1.5 |
| NM_020230    | A_17_P10880350 | PPAN        | chr19:010082461-010082512 | sparse-CGI | 840 | 66474.46  | 43175.96  | 1.5 |
| NM_015329    | A_17_P10908721 | KIAA0892    | chr19:019316769-019316824 | sparse-CGI | 278 | 131326.60 | 82354.85  | 1.6 |
| NM_015329    | A_17_P10908723 | KIAA0892    | chr19:019316932-019316977 | sparse-CGI | 278 | 231922.30 | 139090.40 | 1.7 |
| NM_005031    | A_17_P10946742 | FXYD1       | chr19:040321839-040321884 | sparse-CGI | 773 | 108167.30 | 56838.41  | 1.9 |
| NM_005031    | A_17_P10946743 | FXYD1       | chr19:040321951-040321996 | sparse-CGI | 773 | 95149.09  | 53190.97  | 1.8 |
| NM_005031    | A_17_P10946744 | FXYD1       | chr19:040322096-040322142 | sparse-CGI | 773 | 49300.84  | 24049.94  | 2.0 |
| NM_005031    | A_17_P10946745 | FXYD1       | chr19:040322308-040322355 | sparse-CGI | 773 | 51047.10  | 27767.37  | 1.8 |
| NM_033557    | A_17_P10955826 | YIF1B       | chr19:043487830-043487875 | sparse-CGI | 777 | 79172.64  | 30623.88  | 2.6 |
| NM_033557    | A_17_P10955827 | YIF1B       | chr19:043488008-043488053 | sparse-CGI | 777 | 130026.70 | 57671.61  | 2.3 |
| NM_032255    | A_17_P10981353 | ZNF541      | chr19:052739624-052739669 | sparse-CGI | 319 | 384305.00 | 217941.40 | 1.8 |
| NM_016148    | A_17_P10990436 | SHANK1      | chr19:055911925-055911970 | sparse-CGI | 192 | 241668.50 | 153345.80 | 1.6 |
| nahsa-mi     | A_17_P10993885 | hsa-mir-99b | chr19:056887151-056887196 | sparse-CGI | 957 | 140232.50 | 83293.32  | 1.7 |
| NM_020230    | A_76_P0161655  | PPAN        | chr19:10082596-10082656   | sparse-CGI | 840 | 63272.87  | 35361.97  | 1.8 |
| NM_020230    | A_76_P0149633  | PPAN        | chr19:10082937-10082877   | sparse-CGI | 922 | 9881.81   | 6610.27   | 1.5 |
| NM_002566    | A_76_P0160011  | P2RY11      | chr19:10083174-10083234   | sparse-CGI | 922 | 11158.09  | 6662.58   | 1.7 |
| NM_002566    | A_76_P0140436  | P2RY11      | chr19:10083468-10083408   | sparse-CGI | 922 | 26591.03  | 18018.76  | 1.5 |
| NM_145045    | A_76_P0139614  | MGC20983    | chr19:11402562-11402502   | sparse-CGI | 974 | 29684.40  | 12293.18  | 2.4 |
| NM_145045    | A_76_P0159745  | MGC20983    | chr19:11402722-11402782   | sparse-CGI | 974 | 21546.15  | 7856.59   | 2.7 |
| NM_014173    | A_76_P0158141  | HSPC142     | chr19:17240598-17240538   | sparse-CGI | 921 | 12987.69  | 5811.66   | 2.2 |
| NM_138442    | A_76_P0168653  | LOC115098   | chr19:17901605-17901545   | sparse-CGI | 627 | 23448.62  | 7185.54   | 3.3 |
| NM_002248    | A_76_P0142429  | KCNN1       | chr19:17945999-17945939   | sparse-CGI | 315 | 21585.64  | 14328.91  | 1.5 |
| NM_005755    | A_76_P0167462  | EBI3        | chr19:4175793-4175733     | sparse-CGI | 624 | 45448.82  | 10266.17  | 4.4 |
| NM_005755    | A_76_P0139852  | EBI3        | chr19:4175850-4175910     | sparse-CGI | 624 | 58925.14  | 13960.73  | 4.2 |
| NM_005755    | A_76_P0171853  | EBI3        | chr19:4177085-4177025     | sparse-CGI | 989 | 23046.21  | 9207.02   | 2.5 |
| NM_024907    | A_76_P0146922  | FBXO17      | chr19:44158922-44158862   | sparse-CGI | 853 | 16280.70  | 3420.29   | 4.8 |
| NM_002774    | A_76_P0152931  | KLK6        | chr19:56165470-56165530   | sparse-CGI | 836 | 14304.87  | 5295.41   | 2.7 |
| NM_214710    | A_76_P0140910  | PRSSL1      | chr19:646865-646925       | sparse-CGI | 979 | 8525.71   | 4763.05   | 1.8 |
| NM_173481    | A_76_P0151431  | C19orf21    | chr19:702402-702342       | sparse-CGI | 547 | 61776.09  | 35985.97  | 1.7 |
| NM_002777    | A_76_P0166357  | PRTN3       | chr19:787874-787814       | sparse-CGI | 885 | 13527.73  | 6097.23   | 2.2 |
| NM_001004699 | A_76_P0144073  | OR2Z1       | chr19:8701621-8701561     | sparse-CGI | 627 | 22845.00  | 10200.84  | 2.2 |

|              |                |             |                           |            |     |           |           |     |
|--------------|----------------|-------------|---------------------------|------------|-----|-----------|-----------|-----|
| nahsa-mi     | A_17_P01897024 | hsa-mir-26b | chr2:219092887-219092937  | sparse-CGI | 500 | 80170.23  | 27651.29  | 2.9 |
| NM_007127    | A_76_P0131672  | VIL1        | chr2:219114241-219114181  | sparse-CGI | 921 | 143350.70 | 56843.03  | 2.5 |
| NM_022134    | A_76_P0119509  | GAL3ST2     | chr2:242436126-242436186  | sparse-CGI | 813 | 24867.87  | 16808.47  | 1.5 |
| NM_004118    | A_17_P11131771 | FKHL18      | chr20:029896841-029896886 | sparse-CGI | 349 | 206796.80 | 124046.50 | 1.7 |
| NM_017454    | A_17_P11201303 | STAU        | chr20:047239193-047239253 | sparse-CGI | 417 | 49635.84  | 32055.69  | 1.5 |
| NM_178463    | A_17_P11261092 | C20orf166   | chr20:060554500-060554545 | sparse-CGI | 741 | 87194.35  | 50480.90  | 1.7 |
| NM_178463    | A_17_P11261093 | C20orf166   | chr20:060554829-060554874 | sparse-CGI | 741 | 127589.60 | 86024.93  | 1.5 |
| NM_152302    | A_17_P11262759 | C20orf158   | chr20:060982210-060982255 | sparse-CGI | 497 | 187026.70 | 109548.10 | 1.7 |
| NM_152302    | A_17_P11262763 | C20orf158   | chr20:060982594-060982639 | sparse-CGI | 258 | 133081.30 | 70260.35  | 1.9 |
| NM_198078    | A_17_P11401414 | C21orf121   | chr21:042315307-042315355 | sparse-CGI | 770 | 54663.41  | 36645.57  | 1.5 |
| NM_000394    | A_17_P11406742 | CRYAA       | chr21:043462122-043462169 | sparse-CGI | 810 | 38129.26  | 19803.71  | 1.9 |
| NM_000394    | A_17_P11406744 | CRYAA       | chr21:043462341-043462386 | sparse-CGI | 810 | 88456.52  | 43569.80  | 2.0 |
| NM_206965    | A_17_P11419755 | FTCD        | chr21:046399597-046399642 | sparse-CGI | 866 | 156730.80 | 100103.80 | 1.6 |
| NM_198078    | A_76_P0154234  | C21orf121   | chr21:42315368-42315308   | sparse-CGI | 770 | 55080.23  | 26625.68  | 2.1 |
| NM_198078    | A_76_P0159293  | C21orf121   | chr21:42315519-42315579   | sparse-CGI | 770 | 35258.58  | 17881.64  | 2.0 |
| NM_194309    | A_76_P0155335  | C21orf125   | chr21:43694024-43694084   | sparse-CGI | 897 | 54237.84  | 35347.60  | 1.5 |
| NM_173510    | A_76_P0166146  | FLJ33814    | chr22:27491893-27491953   | sparse-CGI | 986 | 13457.72  | 3375.04   | 4.0 |
| NM_153609    | A_76_P0143157  | TMPRSS6     | chr22:35823799-35823859   | sparse-CGI | 718 | 46183.60  | 19696.46  | 2.3 |
| NM_002673    | A_17_P02222378 | PLXNB1      | chr3:048440760-048440805  | sparse-CGI | 976 | 54487.82  | 31354.17  | 1.7 |
| NM_001008269 | A_17_P02223388 | LOC440955   | chr3:048634359-048634404  | sparse-CGI | 638 | 49767.46  | 24569.35  | 2.0 |
| NM_007354    | A_17_P02575176 | GR6         | chr3:129775946-129776006  | sparse-CGI | 336 | 169653.00 | 88917.73  | 1.9 |
| NM_000174    | A_17_P02576773 | GP9         | chr3:130263520-130263565  | sparse-CGI | 234 | 256980.30 | 98645.30  | 2.6 |
| NM_139209    | A_17_P02631006 | GRK7        | chr3:142980075-142980120  | sparse-CGI | 236 | 238309.80 | 142238.80 | 1.7 |
| NM_022147    | A_76_P0109614  | IFRG28      | chr3:188568713-188568653  | sparse-CGI | 975 | 8767.08   | 5147.50   | 1.7 |
| NM_022147    | A_76_P0119753  | IFRG28      | chr3:188568932-188568992  | sparse-CGI | 975 | 7336.84   | 4119.78   | 1.8 |
| NM_022304    | A_76_P0118603  | HRH2        | chr5:175042509-175042569  | sparse-CGI | 957 | 23461.53  | 12408.63  | 1.9 |
| NM_022304    | A_17_P04481998 | HRH2        | chr5:175042608-175042668  | sparse-CGI | 957 | 7116.48   | 4833.93   | 1.5 |
| NM_022304    | A_17_P04482002 | HRH2        | chr5:175042991-175043037  | sparse-CGI | 957 | 55865.70  | 37693.50  | 1.5 |
| NM_001031799 | A_17_P04496677 | RASGEF1C    | chr5:179496755-179496801  | sparse-CGI | 600 | 201820.90 | 107221.60 | 1.9 |
| NM_018950    | A_76_P0124503  | HLA         | chr6:29798665-29798725    | sparse-CGI | 666 | 10744.63  | 3104.45   | 3.5 |
| NM_002754    | A_76_P0120508  | MAPK13      | chr6:36204659-36204599    | sparse-CGI | 961 | 27751.13  | 8885.33   | 3.1 |
| NM_001760    | A_76_P0114954  | CCND3       | chr6:42024722-42024782    | sparse-CGI | 709 | 23814.86  | 6658.04   | 3.6 |
| NM_017781    | A_17_P05260811 | CYP2W1      | chr7:000796070-000796115  | sparse-CGI | 746 | 545277.30 | 335725.40 | 1.6 |
| NM_017781    | A_17_P05260812 | CYP2W1      | chr7:000796226-000796271  | sparse-CGI | 92  | 14180.46  | 4233.02   | 3.3 |
| NM_017781    | A_17_P05260813 | CYP2W1      | chr7:000796436-000796481  | sparse-CGI | 558 | 71732.40  | 44602.46  | 1.6 |
| NM_017781    | A_76_P0112037  | CYP2W1      | chr7:795672-795612        | sparse-CGI | 746 | 68839.49  | 29200.88  | 2.4 |
| NM_017781    | A_76_P0123551  | CYP2W1      | chr7:795918-795978        | sparse-CGI | 746 | 90855.03  | 38611.56  | 2.4 |

|              |                |           |                          |            |     |           |           |      |
|--------------|----------------|-----------|--------------------------|------------|-----|-----------|-----------|------|
| NM_017781    | A_76_P0107603  | CYP2W1    | chr7:796462-796522       | sparse-CGI | 558 | 78830.77  | 51823.11  | 1.5  |
| NM_033512    | A_17_P06321832 | TSPYL5    | chr8:098360078-098360130 | sparse-CGI | 634 | 89391.77  | 49341.48  | 1.8  |
| NM_033512    | A_17_P06321833 | TSPYL5    | chr8:098360236-098360293 | sparse-CGI | 634 | 54092.72  | 30118.32  | 1.8  |
| NM_178857    | A_76_P0108235  | RP1L1     | chr8:10566933-10566993   | sparse-CGI | 899 | 44357.72  | 28836.12  | 1.5  |
| NM_178857    | A_76_P0131303  | RP1L1     | chr8:10567195-10567135   | sparse-CGI | 611 | 92283.83  | 59467.28  | 1.6  |
| NM_178857    | A_76_P0127127  | RP1L1     | chr8:10567379-10567439   | sparse-CGI | 611 | 64864.51  | 39493.62  | 1.6  |
| NM_002066    | A_17_P06530833 | GML       | chr8:143912981-143913026 | sparse-CGI | 967 | 41528.31  | 19855.68  | 2.1  |
| NM_002066    | A_76_P0135776  | GML       | chr8:143913050-143913110 | sparse-CGI | 967 | 19461.73  | 11018.35  | 1.8  |
| NM_002066    | A_76_P0106226  | GML       | chr8:143913361-143913301 | sparse-CGI | 967 | 28659.37  | 10865.59  | 2.6  |
| NM_002066    | A_76_P0108341  | GML       | chr8:143913581-143913641 | sparse-CGI | 967 | 23038.31  | 12341.01  | 1.9  |
| NM_198488    | A_17_P06533885 | FLJ46072  | chr8:144883353-144883398 | sparse-CGI | 251 | 142831.70 | 91567.53  | 1.6  |
| NM_201379    | A_17_P06534808 | PLEC1     | chr8:145100727-145100772 | sparse-CGI | 447 | 328586.00 | 194666.10 | 1.7  |
| NM_017767    | A_17_P06536092 | SLC39A4   | chr8:145612601-145612646 | sparse-CGI | 879 | 191783.90 | 111538.00 | 1.7  |
| NM_017767    | A_17_P06536093 | SLC39A4   | chr8:145612819-145612864 | sparse-CGI | 879 | 136890.90 | 94084.42  | 1.5  |
| NM_017767    | A_17_P06536094 | SLC39A4   | chr8:145612978-145613023 | sparse-CGI | 879 | 161590.50 | 106179.40 | 1.5  |
| NM_130849    | A_17_P06536095 | SLC39A4   | chr8:145613159-145613204 | sparse-CGI | 255 | 278005.20 | 176792.30 | 1.6  |
| NM_013432    | A_76_P0104105  | NFKBIL2   | chr8:145632284-145632224 | sparse-CGI | 622 | 171901.60 | 67956.92  | 2.5  |
| NM_013432    | A_76_P0125551  | NFKBIL2   | chr8:145632505-145632565 | sparse-CGI | 622 | 136458.70 | 66970.46  | 2.0  |
| NM_033512    | A_76_P0130327  | TSPYL5    | chr8:98360040-98360100   | sparse-CGI | 634 | 32502.56  | 15475.24  | 2.1  |
| NM_080655    | A_76_P0121584  | MGC17337  | chr9:100266920-100266860 | sparse-CGI | 645 | 15659.90  | 3871.83   | 4.0  |
| NM_080655    | A_76_P0119922  | MGC17337  | chr9:100267140-100267200 | sparse-CGI | 645 | 14550.66  | 3781.18   | 3.8  |
| NM_203305    | A_17_P06971430 | C9orf132  | chr9:127792251-127792299 | sparse-CGI | 817 | 44044.75  | 29124.06  | 1.5  |
| NM_203305    | A_76_P0123284  | EEIG1     | chr9:127794375-127794315 | sparse-CGI | 571 | 17871.01  | 5090.79   | 3.5  |
| NM_001013652 | A_17_P06972087 | LOC389791 | chr9:127971170-127971215 | sparse-CGI | 251 | 163413.10 | 66849.98  | 2.4  |
| NM_002957    | A_76_P0109937  | RXRA      | chr9:134519034-134518974 | sparse-CGI | 797 | 40300.63  | 25020.38  | 1.6  |
| NM_002957    | A_17_P06998812 | RXRA      | chr9:134519247-134519292 | sparse-CGI | 797 | 207960.20 | 121250.90 | 1.7  |
| NM_002957    | A_76_P0102558  | RXRA      | chr9:134519255-134519315 | sparse-CGI | 797 | 105568.90 | 53711.25  | 2.0  |
| NM_002957    | A_17_P06998814 | RXRA      | chr9:134519384-134519429 | sparse-CGI | 797 | 266752.10 | 137082.20 | 1.9  |
| NM_002957    | A_17_P06999040 | RXRA      | chr9:134555947-134555992 | sparse-CGI | 957 | 107583.10 | 57625.62  | 1.9  |
| NM_002957    | A_17_P06999042 | RXRA      | chr9:134556104-134556149 | sparse-CGI | 957 | 68785.93  | 39859.59  | 1.7  |
| NM_001012415 | A_76_P0119562  | C9orf157  | chr9:135817221-135817161 | sparse-CGI | 557 | 76108.52  | 4431.50   | 17.2 |
| NM_001012415 | A_76_P0133879  | C9orf157  | chr9:135817440-135817500 | sparse-CGI | 136 | 22443.88  | 11935.98  | 1.9  |
| NM_001012415 | A_76_P0116575  | C9orf157  | chr9:135817779-135817719 | sparse-CGI | 792 | 143038.60 | 68706.64  | 2.1  |
| NM_001012415 | A_76_P0130533  | C9orf157  | chr9:135817963-135818023 | sparse-CGI | 792 | 77610.74  | 40224.89  | 1.9  |
| NM_203347    | A_17_P07010195 | UNQ2541   | chr9:136935252-136935297 | sparse-CGI | 927 | 65338.01  | 40506.54  | 1.6  |
| NM_203347    | A_17_P07010196 | UNQ2541   | chr9:136935451-136935499 | sparse-CGI | 927 | 91140.12  | 52458.37  | 1.7  |
| NM_001606    | A_76_P0135415  | ABCA2     | chr9:137193230-137193290 | sparse-CGI | 995 | 9179.89   | 4688.06   | 2.0  |



|              |                |          |                                |            |     |           |           |     |
|--------------|----------------|----------|--------------------------------|------------|-----|-----------|-----------|-----|
| NM_001606    | A_76_P0126606  | ABCA2    | chr9:137193569-137193509       | sparse-CGI | 995 | 20426.85  | 7372.86   | 2.8 |
| NM_001606    | A_76_P0116168  | ABCA2    | chr9:137193715-137193775       | sparse-CGI | 995 | 11395.65  | 5102.68   | 2.2 |
| NM_000832    | A_17_P07011733 | GRIN1    | chr9:137307716-137307761       | sparse-CGI | 662 | 196057.30 | 111264.80 | 1.8 |
| NM_205849    | A_17_P11576285 | FAM9B    | chrX:008811102-008811147       | sparse-CGI | 380 | 143101.70 | 40551.93  | 3.5 |
| NM_174901    | A_17_P11596564 | FAM9C    | chrX:012822539-012822584       | sparse-CGI | 282 | 165130.70 | 66742.09  | 2.5 |
| NM_130776    | A_17_P11751377 | XAGE3    | chrX:052779864-052779909       | sparse-CGI | 987 | 77435.94  | 20902.85  | 3.7 |
| NM_145799    | A_17_P11915792 |          | 6-Sep chrX:118610146-118610191 | sparse-CGI | 341 | 162314.90 | 96657.31  | 1.7 |
| NM_173493    | A_76_P0160780  | PASD1    | chrX:150402385-150402445       | sparse-CGI | 713 | 30335.49  | 11307.22  | 2.7 |
| NM_173493    | A_76_P0137878  | PASD1    | chrX:150402669-150402609       | sparse-CGI | 713 | 93805.17  | 39532.15  | 2.4 |
| NM_173493    | A_17_P12027082 | PASD1    | chrX:150402730-150402777       | sparse-CGI | 713 | 108848.40 | 31618.23  | 3.4 |
| NM_001011543 | A_17_P12029434 | MAGEA10  | chrX:150977429-150977476       | sparse-CGI | 536 | 184215.10 | 81012.47  | 2.3 |
| NM_000054    | A_17_P12035550 | AVPR2    | chrX:152691316-152691361       | sparse-CGI | 707 | 115530.70 | 58740.88  | 2.0 |
| NM_000054    | A_17_P12035552 | AVPR2    | chrX:152691510-152691555       | sparse-CGI | 707 | 91864.43  | 53439.21  | 1.7 |
| NM_172377    | A_17_P12037837 | CTAG2    | chrX:153445187-153445235       | sparse-CGI | 810 | 66070.59  | 19781.84  | 3.3 |
| NM_172377    | A_76_P0155989  | CTAG2    | chrX:153445252-153445312       | sparse-CGI | 810 | 16232.44  | 8812.08   | 1.8 |
| NM_020997    | A_17_P00835626 | LEFTY1   | chr1:222383807-222383860       | non-CGI    | 591 | 213762.70 | 129396.00 | 1.7 |
| NM_198074    | A_17_P00929390 | OR2C3    | chr1:244021534-244021586       | non-CGI    | 829 | 18343.54  | 12215.84  | 1.5 |
| NM_014466    | A_76_P0117289  | TEKT2    | chr1:36216174-36216114         | non-CGI    | 556 | 10698.42  | 6321.64   | 1.7 |
| NM_032807    | A_17_P07045601 | FBXO18   | chr10:005976048-005976095      | non-CGI    | 387 | 12235.19  | 4958.40   | 2.5 |
| NM_002457    | A_17_P07597377 | MUC2     | chr11:001063938-001063983      | non-CGI    | 724 | 122051.40 | 83361.12  | 1.5 |
| NM_002457    | A_17_P07597384 | MUC2     | chr11:001064957-001065002      | non-CGI    | 245 | 71632.75  | 38817.61  | 1.8 |
| NM_006278    | A_17_P08100477 | ST3GAL4  | chr11:125781641-125781686      | non-CGI    | 724 | 62738.20  | 42342.93  | 1.5 |
| NM_006278    | A_17_P08100479 | ST3GAL4  | chr11:125781772-125781817      | non-CGI    | 724 | 133812.20 | 78169.30  | 1.7 |
| NM_004963    | A_17_P08206334 | GUCY2C   | chr12:014740322-014740382      | non-CGI    | 512 | 111769.30 | 28162.50  | 4.0 |
| NM_170754    | A_17_P08357622 | TENC1    | chr12:051730476-051730522      | non-CGI    | 788 | 260830.50 | 177945.20 | 1.5 |
| NM_004963    | A_76_P0148090  | GUCY2C   | chr12:14740507-14740567        | non-CGI    | 512 | 30442.55  | 11337.29  | 2.7 |
| NM_198232    | A_17_P09156133 | RNASE1   | chr14:020340194-020340245      | non-CGI    | 885 | 38343.78  | 25051.50  | 1.5 |
| NM_198232    | A_17_P09156135 | RNASE1   | chr14:020340403-020340463      | non-CGI    | 885 | 22716.16  | 15558.98  | 1.5 |
| NM_198232    | A_17_P09156138 | RNASE1   | chr14:020340677-020340725      | non-CGI    | 885 | 33999.27  | 21882.55  | 1.6 |
| NM_198235    | A_17_P09156142 | RNASE1   | chr14:020341032-020341082      | non-CGI    | 454 | 60629.86  | 37894.07  | 1.6 |
| NM_004050    | A_17_P09167177 | BCL2L2   | chr14:022846548-022846608      | non-CGI    | 415 | 15344.93  | 8944.60   | 1.7 |
| NM_004050    | A_17_P09167179 | BCL2L2   | chr14:022846738-022846795      | non-CGI    | 415 | 23461.23  | 13355.41  | 1.8 |
| NM_015299    | A_17_P09172083 | KIAA0323 | chr14:023967373-023967418      | non-CGI    | 785 | 71407.78  | 22362.09  | 3.2 |
| NM_015299    | A_17_P09172086 | KIAA0323 | chr14:023967665-023967723      | non-CGI    | 785 | 129785.10 | 39591.21  | 3.3 |
| NM_001002236 | A_17_P09484734 | SERPINA1 | chr14:093926976-093927023      | non-CGI    | 449 | 75640.12  | 30049.23  | 2.5 |
| NM_001002236 | A_17_P09484736 | SERPINA1 | chr14:093927140-093927185      | non-CGI    | 449 | 221345.90 | 94985.24  | 2.3 |

|              |                |           |                           |         |     |           |           |     |
|--------------|----------------|-----------|---------------------------|---------|-----|-----------|-----------|-----|
| NM_001002236 | A_17_P09484738 | SERPINA1  | chr14:093927348-093927394 | non-CGI | 449 | 56231.88  | 21802.28  | 2.6 |
| NM_024515    | A_17_P09514219 | MGC4645   | chr14:099917321-099917367 | non-CGI | 347 | 142515.10 | 87295.66  | 1.6 |
| NM_024515    | A_17_P09514221 | MGC4645   | chr14:099917569-099917614 | non-CGI | 347 | 123798.80 | 63274.41  | 2.0 |
| NM_002933    | A_76_P0149154  | RNASE1    | chr14:20340559-20340619   | non-CGI | 885 | 22549.34  | 9537.50   | 2.4 |
| NM_198235    | A_76_P0138867  | RNASE1    | chr14:20341119-20341179   | non-CGI | 454 | 31263.73  | 21089.20  | 1.5 |
| NM_015299    | A_76_P0160969  | KIAA0323  | chr14:23967814-23967754   | non-CGI | 785 | 40568.48  | 13994.11  | 2.9 |
| NM_014249    | A_17_P09748983 | NR2E3     | chr15:069889880-069889932 | non-CGI | 95  | 7535.99   | 3188.58   | 2.4 |
| NM_001013638 | A_17_P09883529 | LOC388199 | chr16:000795533-000795578 | non-CGI | 891 | 71599.25  | 46143.25  | 1.6 |
| NM_182563    | A_17_P09889593 | MGC21830  | chr16:002201812-002201860 | non-CGI | 243 | 139117.20 | 79804.83  | 1.7 |
| NM_133450    | A_17_P09899494 | KIAA1977  | chr16:004720167-004720212 | non-CGI | 821 | 40131.45  | 24911.59  | 1.6 |
| NM_033309    | A_17_P10083340 | MGC4655   | chr16:065743274-065743319 | non-CGI | 897 | 65731.69  | 40691.05  | 1.6 |
| NM_152456    | A_17_P10096539 | MGC34647  | chr16:069238443-069238488 | non-CGI | 338 | 29280.82  | 16388.84  | 1.8 |
| NM_152348    | A_17_P10191174 | FLJ33817  | chr17:001576966-001577011 | non-CGI | 389 | 165377.30 | 65755.96  | 2.5 |
| NM_152348    | A_17_P10191176 | FLJ33817  | chr17:001577145-001577190 | non-CGI | 389 | 205586.20 | 82257.97  | 2.5 |
| NM_152348    | A_17_P10191178 | FLJ33817  | chr17:001577310-001577355 | non-CGI | 845 | 117401.40 | 67680.97  | 1.7 |
| NM_152348    | A_17_P10191179 | FLJ33817  | chr17:001577446-001577491 | non-CGI | 845 | 98013.57  | 41415.51  | 2.4 |
| NM_152348    | A_17_P10191181 | FLJ33817  | chr17:001577628-001577673 | non-CGI | 845 | 128098.20 | 57114.23  | 2.2 |
| NM_152348    | A_17_P10191183 | FLJ33817  | chr17:001577867-001577913 | non-CGI | 845 | 137144.20 | 67212.12  | 2.0 |
| NM_152348    | A_17_P10191185 | FLJ33817  | chr17:001577994-001578039 | non-CGI | 845 | 124895.70 | 59971.13  | 2.1 |
| NM_152348    | A_17_P10191187 | FLJ33817  | chr17:001578127-001578172 | non-CGI | 807 | 33401.64  | 18512.06  | 1.8 |
| NM_152348    | A_17_P10191188 | FLJ33817  | chr17:001578241-001578286 | non-CGI | 807 | 56087.40  | 25150.44  | 2.2 |
| NM_145068    | A_17_P10197862 | TRPV3     | chr17:003407727-003407772 | non-CGI | 541 | 109192.80 | 58109.47  | 1.9 |
| NM_001671    | A_17_P10212199 | ASGR1     | chr17:007023112-007023157 | non-CGI | 576 | 219931.20 | 105558.50 | 2.1 |
| NM_000691    | A_17_P10262154 | ALDH3A1   | chr17:019592484-019592529 | non-CGI | 276 | 158995.50 | 82659.04  | 1.9 |
| NM_145110    | A_17_P10265718 | MAP2K3    | chr17:021140991-021141039 | non-CGI | 789 | 192612.70 | 85528.02  | 2.3 |
| NM_145110    | A_17_P10265721 | MAP2K3    | chr17:021141278-021141323 | non-CGI | 789 | 125022.60 | 47442.46  | 2.6 |
| NM_145110    | A_17_P10265724 | MAP2K3    | chr17:021141546-021141591 | non-CGI | 789 | 175194.00 | 67604.88  | 2.6 |
| NM_145110    | A_17_P10265725 | MAP2K3    | chr17:021141708-021141753 | non-CGI | 130 | 38372.97  | 26149.19  | 1.5 |
| NM_001015002 | A_17_P10466810 | LLGL2     | chr17:071051337-071051389 | non-CGI | 907 | 117647.30 | 75158.59  | 1.6 |
| NM_207389    | A_17_P10491939 | FLJ44861  | chr17:076753015-076753060 | non-CGI | 805 | 77061.43  | 43380.86  | 1.8 |
| NM_145068    | A_76_P0159219  | TRPV3     | chr17:3407735-3407795     | non-CGI | 541 | 42882.21  | 16514.81  | 2.6 |
| NM_004524    | A_76_P0160658  | LLGL2     | chr17:71051540-71051600   | non-CGI | 907 | 50151.01  | 23396.12  | 2.1 |
| NM_207389    | A_76_P0140438  | FLJ44861  | chr17:76721061-76721001   | non-CGI | 129 | 12239.99  | 6919.87   | 1.8 |
| NM_207389    | A_76_P0162400  | FLJ44861  | chr17:76753268-76753208   | non-CGI | 805 | 19602.75  | 12318.58  | 1.6 |
| NM_001611    | A_17_P10884783 | ACP5      | chr19:011549111-011549156 | non-CGI | 167 | 67248.20  | 10920.79  | 6.2 |
| NM_001611    | A_17_P10884784 | ACP5      | chr19:011549264-011549309 | non-CGI | 387 | 177677.30 | 95560.67  | 1.9 |
| NM_001611    | A_17_P10884787 | ACP5      | chr19:011549485-011549537 | non-CGI | 387 | 185909.30 | 98980.06  | 1.9 |

|           |                |          |                           |         |     |           |           |     |
|-----------|----------------|----------|---------------------------|---------|-----|-----------|-----------|-----|
| NM_031941 | A_17_P10901543 | USHBP1   | chr19:017236464-017236510 | non-CGI | 425 | 229532.80 | 155238.90 | 1.5 |
| NM_007000 | A_17_P10948513 | UPK1A    | chr19:040849595-040849641 | non-CGI | 787 | 123292.60 | 72713.60  | 1.7 |
| NM_198125 | A_17_P10949481 | TYROBP   | chr19:041091232-041091280 | non-CGI | 477 | 10140.81  | 6922.38   | 1.5 |
| NM_033068 | A_17_P10990581 | ACPT     | chr19:055985444-055985489 | non-CGI | 677 | 133782.60 | 29325.29  | 4.6 |
| NM_199250 | A_17_P10990628 | MGC13170 | chr19:055994191-055994236 | non-CGI | 394 | 201552.30 | 107125.50 | 1.9 |
| NM_199250 | A_17_P10990630 | MGC13170 | chr19:055994396-055994441 | non-CGI | 394 | 168035.50 | 87648.72  | 1.9 |
| NM_024298 | A_17_P10999406 | LENG4    | chr19:059369527-059369572 | non-CGI | 373 | 162373.30 | 92815.89  | 1.7 |
| NM_024298 | A_17_P10999408 | LENG4    | chr19:059369732-059369777 | non-CGI | 373 | 214380.20 | 116226.10 | 1.8 |
| NM_020410 | A_76_P0166318  | ATP13A1  | chr19:19621166-19621106   | non-CGI | 840 | 37278.38  | 24053.18  | 1.5 |
| NM_020410 | A_76_P0146545  | ATP13A1  | chr19:19621349-19621409   | non-CGI | 840 | 83403.66  | 50537.39  | 1.7 |
| NM_020410 | A_76_P0141526  | ATP13A1  | chr19:19621688-19621628   | non-CGI | 840 | 32173.67  | 15527.07  | 2.1 |
| NM_007000 | A_76_P0167906  | UPK1A    | chr19:40849529-40849469   | non-CGI | 787 | 61588.52  | 34002.62  | 1.8 |
| NM_007000 | A_76_P0149255  | UPK1A    | chr19:40849680-40849740   | non-CGI | 787 | 66281.05  | 34113.76  | 1.9 |
| NM_172140 | A_76_P0152429  | IL29     | chr19:44478560-44478620   | non-CGI | 855 | 25146.31  | 17306.01  | 1.5 |
| NM_172140 | A_76_P0168944  | IL29     | chr19:44478892-44478832   | non-CGI | 855 | 19913.39  | 12536.66  | 1.6 |
| NM_172140 | A_76_P0138600  | IL29     | chr19:44479111-44479171   | non-CGI | 855 | 28647.60  | 16262.84  | 1.8 |
| NM_006114 | A_76_P0160130  | TOMM40   | chr19:50082773-50082833   | non-CGI | 793 | 28454.68  | 16704.95  | 1.7 |
| NM_033068 | A_76_P0161378  | ACPT     | chr19:55985071-55985131   | non-CGI | 677 | 36599.01  | 9383.42   | 3.9 |
| NM_033068 | A_76_P0142949  | ACPT     | chr19:55985410-55985350   | non-CGI | 677 | 86579.83  | 27205.66  | 3.2 |
| NM_182586 | A_17_P00988277 | FLJ33534 | chr2:011222676-011222723  | non-CGI | 249 | 208846.10 | 103978.40 | 2.0 |
| NM_080653 | A_17_P01152721 | ATP6V1E2 | chr2:046657832-046657878  | non-CGI | 341 | 168126.70 | 55762.44  | 3.0 |
| NM_144712 | A_17_P01900464 | SLC23A3  | chr2:219859941-219859996  | non-CGI | 685 | 281883.90 | 89110.92  | 3.2 |
| NM_144712 | A_76_P0135717  | SLC23A3  | chr2:219860046-219860106  | non-CGI | 685 | 69824.07  | 32069.99  | 2.2 |
| NM_144712 | A_17_P01900466 | SLC23A3  | chr2:219860082-219860127  | non-CGI | 685 | 225585.30 | 81982.46  | 2.8 |
| NM_001631 | A_76_P0119215  | ALPI     | chr2:233145814-233145874  | non-CGI | 845 | 18802.22  | 9501.83   | 2.0 |
| NM_001631 | A_17_P01963021 | ALPI     | chr2:233145862-233145907  | non-CGI | 259 | 137456.60 | 78511.19  | 1.8 |
| NM_001631 | A_17_P01963023 | ALPI     | chr2:233146128-233146177  | non-CGI | 621 | 98862.70  | 58908.39  | 1.7 |
| NM_001631 | A_76_P0108171  | ALPI     | chr2:233146153-233146093  | non-CGI | 621 | 29233.83  | 19223.76  | 1.5 |
| NM_001631 | A_17_P01963024 | ALPI     | chr2:233146301-233146346  | non-CGI | 621 | 185335.80 | 89715.01  | 2.1 |
| NM_001631 | A_76_P0107821  | ALPI     | chr2:233146330-233146390  | non-CGI | 621 | 91549.58  | 53477.07  | 1.7 |
| NM_001631 | A_76_P0128731  | ALPI     | chr2:233146670-233146610  | non-CGI | 621 | 62294.43  | 29859.03  | 2.1 |
| NM_003650 | A_17_P11126228 | CST7     | chr20:024878151-024878196 | non-CGI | 108 | 63956.28  | 42605.03  | 1.5 |
| NM_174897 | A_17_P11136246 | BPIL3    | chr20:031082616-031082662 | non-CGI | 741 | 78682.82  | 52721.21  | 1.5 |
| NM_174897 | A_17_P11136252 | BPIL3    | chr20:031083179-031083224 | non-CGI | 741 | 101002.40 | 64034.33  | 1.6 |
| NM_181467 | A_17_P11144308 | ITGB4BP  | chr20:033336860-033336905 | non-CGI | 226 | 105870.30 | 72586.70  | 1.5 |
| NM_003349 | A_17_P11204511 | Kua-UEV  | chr20:048179938-048179983 | non-CGI | 301 | 77805.24  | 44163.06  | 1.8 |
| NM_003650 | A_76_P0151084  | CST7     | chr20:24878164-24878224   | non-CGI | 108 | 11049.83  | 5683.66   | 1.9 |

|              |                |           |                           |         |     |           |           |     |
|--------------|----------------|-----------|---------------------------|---------|-----|-----------|-----------|-----|
| NM_174897    | A_76_P0155234  | BPIL3     | chr20:31082791-31082731   | non-CGI | 741 | 58523.04  | 37241.21  | 1.6 |
| NM_174897    | A_76_P0138396  | BPIL3     | chr20:31082944-31083004   | non-CGI | 741 | 44553.22  | 26217.39  | 1.7 |
| NM_174897    | A_76_P0162663  | BPIL3     | chr20:31083231-31083171   | non-CGI | 741 | 46376.88  | 28411.70  | 1.6 |
| NM_019601    | A_17_P11445755 | SUSD2     | chr22:022901596-022901641 | non-CGI | 728 | 77996.01  | 33630.51  | 2.3 |
| NM_019601    | A_17_P11445756 | SUSD2     | chr22:022901727-022901772 | non-CGI | 728 | 49240.74  | 16620.20  | 3.0 |
| NM_019601    | A_17_P11445757 | SUSD2     | chr22:022901846-022901891 | non-CGI | 728 | 103668.20 | 33778.68  | 3.1 |
| NM_001051    | A_17_P11496472 | SSTR3     | chr22:035933394-035933439 | non-CGI | 832 | 43455.07  | 7287.93   | 6.0 |
| NM_001051    | A_17_P11496473 | SSTR3     | chr22:035933775-035933820 | non-CGI | 832 | 39165.25  | 5185.08   | 7.6 |
| NM_025045    | A_17_P11499956 | BAIAP2L2  | chr22:036830994-036831039 | non-CGI | 550 | 7155.76   | 4426.99   | 1.6 |
| NM_019601    | A_76_P0151644  | SUSD2     | chr22:22901456-22901396   | non-CGI | 728 | 33883.27  | 14650.97  | 2.3 |
| NM_019601    | A_76_P0146131  | SUSD2     | chr22:22901541-22901601   | non-CGI | 728 | 51577.48  | 17836.94  | 2.9 |
| NM_019601    | A_76_P0158758  | SUSD2     | chr22:22901871-22901811   | non-CGI | 728 | 53019.91  | 17376.13  | 3.1 |
| NM_025045    | A_76_P0171875  | BAIAP2L2  | chr22:36830861-36830801   | non-CGI | 550 | 16800.87  | 8562.55   | 2.0 |
| NM_033199    | A_17_P02222985 | UCN2      | chr3:048576350-048576397  | non-CGI | 915 | 40490.75  | 21443.08  | 1.9 |
| NM_000094    | A_17_P02222986 | COL7A1    | chr3:048576751-048576796  | non-CGI | 915 | 117077.00 | 58665.12  | 2.0 |
| NM_003262    | A_17_P02758680 | TLOC1     | chr3:171166382-171166442  | non-CGI | 460 | 38448.34  | 24774.39  | 1.6 |
| NM_014965    | A_76_P0101166  | OIP106    | chr3:42176114-42176054    | non-CGI | 771 | 5883.90   | 3861.95   | 1.5 |
| NM_014965    | A_76_P0102808  | OIP106    | chr3:42176334-42176394    | non-CGI | 771 | 24195.34  | 15268.97  | 1.6 |
| NM_005847    | A_17_P04318582 | SLC23A1   | chr5:138746661-138746720  | non-CGI | 652 | 20167.13  | 11422.59  | 1.8 |
| NM_152685    | A_17_P04318584 | SLC23A1   | chr5:138746903-138746960  | non-CGI | 652 | 19326.65  | 10583.85  | 1.8 |
| NM_001264    | A_17_P04642515 | CDSN      | chr6:031196222-031196267  | non-CGI | 971 | 34051.28  | 12040.19  | 2.8 |
| NM_007109    | A_76_P0105664  | TCF19     | chr6:31237000-31236940    | non-CGI | 955 | 39524.10  | 5682.83   | 7.0 |
| NM_001013836 | A_17_P05266161 | MAD1L1    | chr7:002042940-002042994  | non-CGI | 486 | 122089.00 | 60425.61  | 2.0 |
| NM_001013836 | A_17_P05266163 | MAD1L1    | chr7:002043120-002043172  | non-CGI | 486 | 97755.44  | 45411.87  | 2.2 |
| NM_001013836 | A_17_P05266165 | MAD1L1    | chr7:002043242-002043287  | non-CGI | 486 | 104818.60 | 46290.11  | 2.3 |
| NM_000385    | A_17_P05396989 | AQP1      | chr7:030723899-030723945  | non-CGI | 740 | 85587.13  | 54886.86  | 1.6 |
| NM_000385    | A_17_P05396991 | AQP1      | chr7:030724136-030724181  | non-CGI | 740 | 111672.80 | 73294.55  | 1.5 |
| NM_006213    | A_17_P05505786 | PHKG1     | chr7:055934828-055934885  | non-CGI | 135 | 104680.00 | 70752.33  | 1.5 |
| NM_002360    | A_76_P0116724  | MAFK      | chr7:1342598-1342538      | non-CGI | 149 | 49401.92  | 21019.69  | 2.4 |
| NM_005775    | A_17_P06006297 | SCAM-1    | chr8:022468109-022468154  | non-CGI | 381 | 382837.80 | 201370.20 | 1.9 |
| NM_001013842 | A_17_P06006545 | LOC541565 | chr8:022514554-022514599  | non-CGI | 710 | 15508.08  | 8235.56   | 1.9 |
| NM_178828    | A_17_P06801115 | C9orf79   | chr9:087727340-087727385  | non-CGI | 890 | 23869.79  | 5594.01   | 4.3 |
| NM_000476    | A_17_P06971105 | AK1       | chr9:127716130-127716175  | non-CGI | 642 | 296627.40 | 148694.00 | 2.0 |
| NM_032874    | A_17_P07010288 | KIAA1984  | chr9:136976660-136976705  | non-CGI | 583 | 373542.40 | 210014.90 | 1.8 |
| NM_000954    | A_17_P07011032 | PTGDS     | chr9:137144596-137144641  | non-CGI | 427 | 281192.50 | 177222.60 | 1.6 |
| NM_000954    | A_17_P07011033 | PTGDS     | chr9:137144741-137144786  | non-CGI | 427 | 181958.30 | 119273.00 | 1.5 |
| NM_080877    | A_17_P07012140 | SLC34A3   | chr9:137402226-137402271  | non-CGI | 543 | 230358.00 | 152788.40 | 1.5 |

|           |                |        |                          |         |     |          |          |     |
|-----------|----------------|--------|--------------------------|---------|-----|----------|----------|-----|
| NM_018969 | A_17_P11751590 | GPR173 | chrX:052961420-052961465 | non-CGI | 526 | 70814.06 | 34834.70 | 2.0 |
| NM_005032 | A_17_P11902756 | PLS3   | chrX:114649878-114649938 | non-CGI | 408 | 44336.86 | 17685.37 | 2.5 |
| NM_007150 | A_17_P12031701 | ZNF185 | chrX:151757433-151757478 | non-CGI | 852 | 46847.97 | 22496.39 | 2.1 |

---
