# Supplementary material for: Genome-Wide Profiling of DNA Methylation Reveals a Class of Normally Methylated CpG Island Promoters
Source: PubMed Central journal article supplement (PMC2041996; doi:10.1371/journal.pgen.0030181), 2007-10-26
Supplement: pgen.0030181.st002.pdf [file pgen.0030181.st002.pdf]

Supplementary Table 2. Validation of SssI treatment by methylation analysis of 41 CpG sites at 7 genes

| Gene Name | No. of<br>CG site | Methylation level (%) |            |
|-----------|-------------------|-----------------------|------------|
|           |                   | before SssI           | after SssI |
| PEX3      | 1                 | 0                     | 89         |
| PEX3      | 2                 | 3                     | 91         |
| PEX3      | 3                 | 0                     | 86         |
| PEX3      | 4                 | 0                     | 91         |
| PEX3      | 5                 | 0                     | 77         |
| PEX3      | 6                 | 0                     | 86         |
| PEX3      | 7                 | 0                     | 99         |
| UBQLN1    | 8                 | 1                     | 96         |
| UBQLN1    | 9                 | 2                     | 95         |
| UBQLN1    | 10                | 0                     | 74         |
| UBQLN1    | 11                | 0                     | 100        |
| UBQLN1    | 12                | 1                     | 98         |
| UBQLN1    | 13                | 2                     | 97         |
| UBQLN1    | 14                | 2                     | 98         |
| ABCB10    | 15                | 0                     | 83         |
| ABCB10    | 16                | 0                     | 67         |
| ABCB10    | 17                | 0                     | 96         |
| ABCB10    | 18                | 0                     | 71         |
| ABCB10    | 19                | 0                     | 94         |
| ABCB10    | 20                | 0                     | 91         |
| MPHOSPH10 | 21                | 1                     | 98         |
| MPHOSPH10 | 22                | 0                     | 98         |
| MPHOSPH10 | 23                | 2                     | 100        |
| MAP3K7    | 24                | 18                    | 90         |
| MAP3K7    | 25                | 27                    | 100        |
| MAP3K7    | 26                | 0                     | 92         |
| MAP3K7    | 27                | 5                     | 91         |
| MLL6      | 28                | 3                     | 88         |
| MLL6      | 29                | 5                     | 100        |
| MLL6      | 30                | 0                     | 84         |
| MLL6      | 31                | 0                     | 97         |
| MLL6      | 32                | 3                     | 100        |
| MLL6      | 33                | 3                     | 91         |
| PPAN      | 34                | 4                     | 92         |
| PPAN      | 35                | 4                     | 94         |
| PPAN      | 36                | 0                     | 100        |
| PPAN      | 37                | 0                     | 100        |
| PPAN      | 38                | 0                     | 92         |
| PPAN      | 39                | 0                     | 78         |
| PPAN      | 40                | 4                     | 95         |
| PPAN      | 41                | 5                     | 100        |
