# Supplementary material for: Genome-Wide Profiling of DNA Methylation Reveals a Class of Normally Methylated CpG Island Promoters
Source: PubMed Central journal article supplement (PMC2041996; doi:10.1371/journal.pgen.0030181), 2007-10-26
Supplement: pgen.0030181.st004.pdf [file pgen.0030181.st004.pdf]

Supplementary Table 4. Primer sequences and PCR conditions for RT-PCR analysis

| Gene     | Accession Number | RT-PCR                   |                         |           |               |        |                |
|----------|------------------|--------------------------|-------------------------|-----------|---------------|--------|----------------|
|          |                  | Formard primer (5'-3')   | Reverse primer (5'-3')  | Size (bp) | Annealing (C) | cycles | exons analyzed |
| ANKRD30A | NM_052997        | CAAAGAGGAAGAAGACCATCAACC | TGATGGCATTGTAGAGCCTTCAT | 181       | 55            | 35     | ex1-3          |
| INSL6    | NM_007179        | AAAAACTCTGCGGCCATGC      | CCCAACTGTTTACTGCTTCTTCC | 201       | 55            | 35     | ex1-2          |
| FLJ40201 | NM_152607        | TGCAGAGCCACAGGTTTGAC     | CCTGTGTCCACCTCCTTCATC   | 181       | 55            | 35     | ex2-3          |
| SOHLH2   | NM_017826.1      | TATCTGCCAGGAGCACTGCC     | GAATATGCAATCATCCAAAAGCG | 187       | 55            | 35     | ex1-2          |
| DPPA5    | NM_001025290     | GGAACTCTCCCGGCACGTA      | CGTAAACCACGACCTCGGTG    | 211       | 55            | 35     | ex1-2          |
| GAPDH    | AF261085         | TCCCATCACCATCTTCCAG      | ATGAGTCCTTCCACGATACC    | 309       | 50            | 25     | NA             |
