# Supplementary material for: Genome-Wide Profiling of DNA Methylation Reveals a Class of Normally Methylated CpG Island Promoters
Source: PLoS Genet. 2007 Oct 26;3(10):e181. doi: 10.1371/journal.pgen.0030181 (PMC2041996; doi:10.1371/journal.pgen.0030181)
Supplement: Table S3 — (9 KB PDF) [file pgen.0030181.st003.pdf]

Supplementary Table 3. Primer sequences and PCR conditions for Bisulfite-pyrosequencing analysis

| Gene     | PCR                      |                                      |           |               | Pyrosequencing       |                                                         |
|----------|--------------------------|--------------------------------------|-----------|---------------|----------------------|---------------------------------------------------------|
|          | Forward primer           | Reverse primer                       | Size (bp) | Annealing (C) | sequence primer      | sequence region                                         |
| FANK1    | GGGGATGAAGGGGTAAAGT      | Biotin-Univ-ACCCTACCAACAACCCCTC      | 208       | 55            | AGTTAGGTTTATTGGGGA   | YGatagYGaYGaYGgYGgYGgtt                                 |
| ME1      | TGTTAATAGTTTGGGGATTTTT   | Biotin-Univ-CCCTACCCRAAAAACTAA       | 144       | 50            | AATTTTTTTAGGTGTTTGAG | YGATYGTYYG TTTTGTTTGA ATYGTTTAGG TTYGTAATTT TTGGTATT    |
| OPLAH    | AAGYGGGAAGTGGGGTTTT      | Biotin-Univ-AACRACCTAATACCCCATAC     | 202       | 60            | TTTTTYYGTGTGAGGGAT   | TTYGTYYAGGGTTTTAGGGTTAGYGGYGTTTTT                       |
| ANKRD30A | AGAGTTTTTGTGGGATTTAGTT   | Biotin-Univ-TCCRCATAATTAACAAAATCCTCT | 165       | 55            | AGTTTTATTATTATGGGTAG | TTTTYAGGGTYGTTTTATTTTTGTATYATYGTGGGG                    |
|          | TGTTAAGYGGGTATGTGGTATGG  | Biotin-Univ-TATTCRCCAAACTCTTACACACT  | 226       | 50            | GGTAGTGTATTATTGTA    | YGYGGTGTYYGGAGAA YGYGGTTAG                              |
|          |                          |                                      |           |               | TTTTTTAGTTTTGTGAGTTG | YGTATGYGTGTGTGGTTAAYGGTTTTGTGTTAGYGYGATTTTA             |
| INSL6    | TTGAGAGAGGTTTGAGTGTGTAA  | Biotin-Univ-ACAAAAATCTCCTCCATAACTAC  | 228       | 55            | TGAGTGTGTAAGAGTTTGG  |                                                         |
|          | AGGTTTGAGTGTGTAAGAGTTTG  | Biotin-Univ-TTCTAAAAATCCCCAAAATAAAC  |           |               | TTATGGAGGAGATTTTTG   |                                                         |
|          | TTTAGGAGTTAGGGTTTGTATT   | Biotin-Univ-CCCTATAACCCAACTAATC      |           |               | TATTTGAGATTTTTGAGTTG | GYGGGAAAGTTTTGAYGTAGTYGGYGYGYGTTTTTTTTTGA               |
| FLJ40201 | AGGGAAGGATTTTGAAAATGT    | Biotin-Univ-CATCCTAACTTTCCCTCATAACAA | 186       | 60            | TTTTTGAAGTTTTGG      | YGAYGTTTTTAYGYGttYGgaatttYtagtgtttgt                    |
| MEST     | AGGTTTGTATGATAGGTTTATAGG | Biotin-Univ-RATACCCRCTACATCCAAA      | 188       | 55            | GATAGTAGGGAGTAGGGTT  | YGgtYGatYGttattgataaYGYGgag                             |
| FTMT     | GGGGYGTTTTTTGGATTTTAG    | Biotin-Univ-CCCRAAAAAATAATAAACATA    | 209       | 60            | GGATAAGTTAAAAATTAG   | YGggttaYGtgYGtaYGtYGtggtggg                             |
| KCNE4    | GTGGAGGTAGTTTAAATGTTGAA  | Biotin-Univ-TACCRATAAAAAACATAACAACC  | 157       | 50            | GYGGTAGTTTTTTTAGTGTT | YGtggttYGttttYGgtttYGgg ttggtgtttYGYGgttttagt           |
| SOHLH2   | TGTTTTGGGAAGGGGATTT      | Biotin-Univ-CCCCAAACRCCCTTAAAAATA    | 187       | 55            | TTTTTGGATTTTAGGTAGAT | YGTTTTTYGTGTTTTTTGGTYGTAGTYGTTTTTT <i>ITYGGG</i> ATTTAT |
|          | TTGGYGATAGGGTTATTTTAAGG  | Biotin-Univ-CTAACCRAAATCTAACAATACTC  | 201       | 55            | GAAAAATGGAGTTTTGAATA | GTAYGTAATTTGGTATYGTYGTTTTTAGTAGTTTT                     |
| ZNF541   | GGGTGTGTTTTAAAGTAAAGGTAA | Biotin-Univ-AAAACCTCCRCTACTAAATCCC   | 109       | 55            | TTAGTAGTTTTTTGGAGTTT | YGTGYGGTYGGYGGYGGTAGYGGTAATGGT                          |
|          | TAGYGGGGAAGATGATTTTTTG   | Biotin-Univ-AAAATCCRCTAAAACTTAATAATC | 228       | 55            | AGGATAGTTTGAGTAGTTTT | YGYGGGTAGGTTTTYGATTYGGGTTTTYGTTGATTT                    |
| SHANK1   |                          |                                      |           |               | AGGAGTTATTAGTGTAGGGG | gYGggttYGggaYGtagYGgttggagttttttgttg                    |
|          |                          |                                      |           |               | GGTTGTTTTAGGATTTAGTA | YGTGYGTAGYGGTTAT                                        |
|          |                          |                                      |           |               | GTGTTTGTTGTTTATAAGTT | TTYGGTYGTGTTTTTYGYGGGAGGGTTTYGAGT                       |
|          |                          |                                      |           |               | GTTTTTAAGAAGGTTAAG   | GTYGATTGYGATTTTTtttgtttagaatttYGggagtt                  |
|          |                          |                                      |           |               | TAGGAGGTTTAGAAGGTAGG | YGggttttttYGgatgttYGtYGtttttYGttagtttttt                |
| RNF113B  | TGTTYGGGATTATAAGAGTGAGT  | Biotin-Univ-CCTAACCCRCTAAAAAACTATC   | 167       | 60            | TTTATAATGATTATAGTTT  | YGYGATAAGYGAGGAYGAGGAAYGTTATAGTG                        |
| CTL2     | GGYGTTGTGTTGGGAGGAGT     | Biotin-Univ-TCRTCCCCATCCCTACA        | 177       | 60            | TTAGAATTGGGAGGGTT    | taYGttttaYGtgtagYGaYGtaagggYGaYGtaaggg                  |
| ACTL7B   | TGAAGTTTAGGAAGGTGTATAAGA | Biotin-Univ-ACTTCAACRAATTACCAACTTAA  | 131       |               | TTAGTGTTTTTTTTAGATT  | YGGGAGGGTYGAGGGGGYGYGGGAGAG                             |
| DPPA5    |                          |                                      |           |               | TTGGGTTTTTAGTATTGTAA | GTGYGGTTAYGYGGGAGAGTYGAGG                               |
|          |                          |                                      |           |               | TGGGTATAGAGTTGTTAAT  | AYGGAGGYGTTTT                                           |
|          |                          |                                      |           |               | AATTTGGAGATAGTTGGGTT | YGGGTGAGGTTTTTYGAAGTYGYGGGAAGYGGGAAGA                   |
| C19orf24 | GGGAAGATGTAAAGGTTATTGTT  | Biotin-Univ-CTCCAAACCTACTACAAAAAAC   | 140       | 50            | GGGTGAGGTTTTTT       | YGAAAGTYGYGGGAAGYGGGAAG                                 |
| C12orf12 | GATAGTGAAGTATTGGGTTGAGA  | Biotin-Univ-ACRCAATAAAACCACTCC       | 189       | 55            | GAGTTGGTAATTTGTTGGAT | YGTAGTTAGGGYGGYGGGGT                                    |
|          |                          |                                      |           |               | GTTATTGAGGGGGT       | TYGTAGYGYGGAGATTTTAGTTTTTYGYGGGATTTG                    |
|          |                          |                                      |           |               | GGGTGTGGTGGGGAT      | TYGGGAGTGG GTTTTATTG                                    |
|          |                          |                                      |           |               | GAGGGAGTAGTAGGTAATTG | YGTAATTTTTGTTTTTYGGTTTTAGTTYGT                          |
| PFN2     | TTGTGGTTGTGGTTGGGTATA    | Biotin-Univ-AACACCCCAATTAAACACAC     | 125       | 60            | TGGGTTTTTAAGGAAGTAG  | TYGAAGTAAT AGTAYGGTTY GGGTTTTTGG TTTTAATTAT T           |
|          |                          |                                      |           |               | TTTTGAGTTTTTGGT      | YGTTTTGTATYGAAGGYGTTYGGGTGT                             |
|          |                          |                                      |           |               | ATATAGGAGAAAAGTATAT  | YGYGGTTYGGTYGYGGGGTTTTAA                                |
